# Supplementary material for: Spatial and Diurnal Variations of Aerosol Organosulfates in Summertime Shanghai, China: Potential Influence of Photochemical Process and Anthropogenic Sulfate Pollution
Source: Copernicus journal article supplement (doi:10.5194/egusphere-2023-1292), 2023-06-14
Supplement: Supplementary file 1 [file egusphere-2023-1292-supplement.pdf]

1 *Supplement of*  
2 **Spatial and Diurnal Variations of Aerosol**  
3 **Organosulfates in Summertime Shanghai, China:**  
4 **Potential Influence of Photochemical Process and**  
5 **Anthropogenic Sulfate Pollution**

6 **Ting Yang, et al.**

7 *Correspondence to:* Yu Xu (xuyu360@sjtu.edu.cn)

8 Yue Zhao (yuezhao20@sjtu.edu.cn)

9 Hua-Yun Xiao (xiaohuayun@sjtu.edu.cn)

10

11 The copyright of individual parts of the supplement might differ from the article licence.

12

13

14

15

## 16 S1. Classification of OSs

17 A total of 212 organosulfates (OSs) were detected in PM<sub>2.5</sub> samples using UPLC-  
18 MS. The quantified OSs were distributed over a wide mass range (m/z 167–489). The  
19 OSs and nitrooxy-organosulfates (NOSs) were initially identified from their molecular  
20 formulas based on the following equation (1) (Wang et al. 2019; Tao et al. 2014).

$$21 \quad n_{\text{O}} / (4n_{\text{S}} + 3n_{\text{N}}) \geq 1 \quad (1)$$

22 where the  $n_{\text{O}}$ ,  $n_{\text{S}}$ , and  $n_{\text{N}}$  denote the number of oxygen, sulfur, and nitrogen atoms in a  
23 molecular formula, respectively.

24 The groups of isoprene-derived, monoterpene-derived, and C<sub>2</sub>-C<sub>3</sub> OSs were  
25 further classified according to previous laboratory and filed studies (Hettiyadura et al.  
26 2019; Wang et al. 2021a). Specifically, the isoprene-derived OSs (OS<sub>i</sub>) were identified  
27 using the following method: (1) molecules with 4 and 5 carbon atoms were selected;  
28 (2) compounds with 4 carbon atoms have a molecular unsaturation degree (SD) of 1–2,  
29  $n_{\text{O}} \leq 6$ , and  $n_{\text{H}} \geq 6$ ; and (3) compounds with 5 carbon atoms have a SD of 0–2,  $n_{\text{O}} \leq 7$ ,  
30 and  $n_{\text{H}} \geq 8$ . The detailed explanations about the workflow were provided by Xu et al.,  
31 (2021) It should be noted that C<sub>7</sub>H<sub>9</sub>O<sub>7</sub>S<sup>-</sup> was classified as OS<sub>i</sub> based on Nozière et al.,  
32 (2010).

33 For monoterpene-derived OSs (OS<sub>m</sub>), they were grouped according to the  
34 following criteria. The compounds have the characteristics of 10 carbon atoms,  
35 effective oxygen atoms ( $n_{\text{Oeff}} = n_{\text{O}} - 2n_{\text{N}}$ ) of more than 4, and  $2 \leq \text{DBE} \leq 4$  (Guo et al.  
36 2022; Ehn et al. 2012; Yan et al. 2016; Jokinen et al. 2014; Boyd et al. 2015; Berndt et  
37 al. 2016; Berndt et al. 2018). Moreover, C<sub>7</sub>H<sub>11</sub>O<sub>6</sub>S<sup>-</sup>, C<sub>7</sub>H<sub>11</sub>O<sub>7</sub>S<sup>-</sup>, C<sub>8</sub>H<sub>13</sub>O<sub>7</sub>S<sup>-</sup>, C<sub>9</sub>H<sub>15</sub>O<sub>6</sub>S

38  $\bar{\cdot}$ , and  $C_9H_{14}NO_8S^-$  were assigned to  $OS_m$  based on previous reports (Yassine et al. 2012;  
39 Nozière et al. 2010; Wang et al. 2017; Surratt et al. 2008). Moreover, correlation  
40 analysis between these target OSs and typical  $OS_m$  (e.g.,  $C_{10}H_{17}O_5S^-$ ) was conducted,  
41 showing the significant correlations between them ( $r = 0.83\text{--}0.99$ ,  $P < 0.01$ ). This result  
42 further confirms the reliability of the above classification.

43 Previous studies have suggested that OSs with double bond equivalent (DBE)  $\geq 2$   
44 and aromaticity equivalent ( $X_c$ )  $\geq 2.5$  can be assigned to aromatic OSs (Jiang et al.  
45 2022; Xie et al. 2021; Xie et al. 2020; Ma et al. 2022). The DBE and  $X_c$  value were  
46 calculated via the following equations, respectively (Yassine et al. 2014).

$$47 \text{DBE} = 1 + n_C - n_H/2 + n_N/2 \quad (2)$$

$$48 X_C = [3(\text{DBE} - (f_m n_O - f_n \times n_S)) - 2] / [\text{DBE} - (f_m n_O - f_n n_S)] \quad (3)$$

49 where the  $n_C$ ,  $n_H$ ,  $n_N$ ,  $n_O$ , and  $n_S$  denote the number of carbon, hydrogen, nitrogen, oxygen,  
50 sulfur atoms in a molecular formula, respectively. The  $f_m$  and  $f_n$  refer to the fractions of  
51 oxygen and sulfur atoms involved in the  $\pi$ -bond structure of the compound, respectively  
52 (Yassine et al. 2014). In this study, the negative mode was used in UPLC-ESI-QToF-  
53 MS analysis, which preferentially identified the compounds containing carboxylic acids  
54 and esters (Ye et al. 2021). Thus, the calculation for  $X_c$  of organosulfates can be  
55 simplified as the following equation (Ye et al. 2021).

$$56 X_C = [3(\text{DBE} - 0.5(n_O - 4)) - 2] / [\text{DBE} - 0.5(n_O - 4)] \quad (4)$$

57 However, the products of monoterpene oxidation by  $\cdot OH$  or  $NO_3\cdot$  also include the  
58 compounds with a DBE value of 2 (Yan et al. 2016; Ehn et al. 2014; Trostl et al. 2016).  
59 This means that  $OS_m$  and aromatic OSs overlapped partly. Thus, aromatic OSs with a

60 DBE value of 2 were further identified through correlation analysis between  
61 unidentified aromatic OSs and known OS<sub>m</sub> and aromatic OSs (Bryant et al. 2021). The  
62 compounds were adopted with r value greater than 0.6.

63 The OSs with DBE less than 2, including alkanes and some unsaturated  
64 compounds, were assigned to aliphatic OSs (Xie et al. 2021; Xie et al. 2020; Tao et al.  
65 2014). Recently, some aliphatic oxygenated organic molecules were found to have a  
66 DBE value of 2 (Wang et al. 2021b). Thus, OSs with a DBE value of 2 were further  
67 identified through correlation analysis between unidentified aliphatic OSs and known  
68 aliphatic subgroups. The compounds were adopted with r value greater than 0.6. It  
69 should be noted that C<sub>9</sub>H<sub>15</sub>O<sub>6</sub>S<sup>-</sup> was divided into OS<sub>m</sub> based on the abovementioned  
70 classification rules for OS<sub>m</sub>, while C<sub>9</sub>H<sub>15</sub>O<sub>7</sub>S<sup>-</sup> was not classified as OS<sub>m</sub>. This is because  
71 C<sub>9</sub>H<sub>15</sub>O<sub>7</sub>S<sup>-</sup> showed a stronger correlation with typical anthropogenic OS  
72 (e.g., C<sub>8</sub>H<sub>17</sub>O<sub>4</sub>S<sup>-</sup>; *r* = 0.98) than typical OS<sub>m</sub> (e.g., C<sub>10</sub>H<sub>17</sub>O<sub>5</sub>S<sup>-</sup>; *r* = 0.96). In this study,  
73 aliphatic and aromatic OSs were referred to anthropogenic OSs (OS<sub>a</sub>). Several reported  
74 OSs (non aromatic or aliphatic compounds) were classified as other anthropogenic OS  
75 (OS<sub>a</sub>-other) (Wang et al. 2021a; Berndt et al. 2016).

76

77

78

79

80

81

82 **Table S1.** Organosulfate quantification using UPLC-ESI(-)-QToFMS.

| Formula<br>[M-H] <sup>-</sup>                                               | MW (Da)  | Standard<br>for quantification | Reference                 | <i>r</i> <sup>2</sup> |
|-----------------------------------------------------------------------------|----------|--------------------------------|---------------------------|-----------------------|
| <b>Isoprene-derived OSs</b>                                                 |          |                                |                           |                       |
| C <sub>4</sub> H <sub>7</sub> O <sub>5</sub> S <sup>-</sup>                 | 167.0014 | Lactic acid sulfate<br>(LAS)   | (Schindelka et al. 2013)  |                       |
| C <sub>4</sub> H <sub>7</sub> O <sub>6</sub> S <sup>-</sup>                 | 182.9963 | LAS                            | (Shalamzari 2013)         |                       |
| C <sub>5</sub> H <sub>9</sub> O <sub>6</sub> S <sup>-</sup>                 | 197.0120 | LAS                            | (Riva et al. 2016a)       |                       |
| C <sub>4</sub> H <sub>7</sub> O <sub>7</sub> S <sup>-</sup>                 | 198.9912 | LAS                            | (Hettiyadura et al. 2015) |                       |
| C <sub>5</sub> H <sub>11</sub> O <sub>6</sub> S <sup>-</sup>                | 199.0276 | LAS                            | (Riva et al. 2016a)       |                       |
| C <sub>5</sub> H <sub>7</sub> O <sub>7</sub> S <sup>-</sup>                 | 210.9912 | LAS                            | (Hettiyadura et al. 2015) |                       |
| C <sub>5</sub> H <sub>9</sub> O <sub>7</sub> S <sup>-</sup>                 | 213.0069 | LAS                            | (Riva et al. 2016a)       |                       |
| C <sub>5</sub> H <sub>11</sub> O <sub>7</sub> S <sup>-</sup>                | 215.0225 | LAS                            | (Surratt et al. 2010)     |                       |
| C <sub>7</sub> H <sub>9</sub> O <sub>7</sub> S <sup>-</sup>                 | 237.0069 | LAS                            | (Nozière et al. 2010)     |                       |
| C <sub>5</sub> H <sub>10</sub> NO <sub>9</sub> S <sup>-</sup>               | 260.0076 | LAS                            | (Surratt et al. 2007)     |                       |
| C <sub>5</sub> H <sub>8</sub> NO <sub>10</sub> S <sup>-</sup>               | 273.9869 | LAS                            | (Nestorowicz et al. 2018) |                       |
| C <sub>5</sub> H <sub>7</sub> O <sub>8</sub> S <sup>-</sup>                 | 226.9862 | LAS                            |                           | 0.90                  |
| C <sub>5</sub> H <sub>9</sub> O <sub>8</sub> S <sup>-</sup>                 | 229.0018 | LAS                            |                           | 0.94                  |
| C <sub>4</sub> H <sub>7</sub> O <sub>8</sub> S <sup>-</sup>                 | 214.9862 | LAS                            |                           | 0.72                  |
| C <sub>4</sub> H <sub>5</sub> O <sub>7</sub> S <sup>-</sup>                 | 196.9756 | LAS                            |                           | 0.67                  |
| C <sub>4</sub> H <sub>6</sub> NO <sub>9</sub> S <sup>-</sup>                | 243.9763 | LAS                            |                           | 0.87                  |
| C <sub>4</sub> H <sub>8</sub> NO <sub>7</sub> S <sup>-</sup>                | 214.0021 | LAS                            |                           | 0.94                  |
| C <sub>5</sub> H <sub>8</sub> NO <sub>7</sub> S <sup>-</sup>                | 226.0021 | LAS                            |                           | 0.90                  |
| C <sub>5</sub> H <sub>9</sub> N <sub>2</sub> O <sub>11</sub> S <sup>-</sup> | 260.0076 | LAS                            |                           | 0.75                  |
| <b>Monoterpene-derived OSs</b>                                              |          |                                |                           |                       |
| C <sub>7</sub> H <sub>11</sub> O <sub>6</sub> S <sup>-</sup>                | 223.0276 | Glycolic acid sulfate<br>(GAS) | (Yassine et al. 2012)     |                       |
| C <sub>7</sub> H <sub>11</sub> O <sub>7</sub> S <sup>-</sup>                | 239.0225 | GAS                            | (Nozière et al. 2010)     |                       |
| C <sub>10</sub> H <sub>17</sub> O <sub>5</sub> S <sup>-</sup>               | 249.0797 | α-Pinene sulfate               | (Wang et al. 2017)        |                       |
| C <sub>8</sub> H <sub>13</sub> O <sub>7</sub> S <sup>-</sup>                | 253.0382 | GAS                            | (Schindelka et al. 2013)  |                       |
| C <sub>10</sub> H <sub>15</sub> O <sub>7</sub> S <sup>-</sup>               | 279.0538 | GAS                            | (Surratt et al. 2007)     |                       |
| C <sub>10</sub> H <sub>17</sub> O <sub>7</sub> S <sup>-</sup>               | 281.0695 | α-Pinene sulfate               | (Nozière et al. 2010)     |                       |
| C <sub>10</sub> H <sub>16</sub> NO <sub>7</sub> S <sup>-</sup>              | 294.0647 | α-Pinene sulfate               | (Surratt et al. 2008)     |                       |
| C <sub>9</sub> H <sub>14</sub> NO <sub>8</sub> S <sup>-</sup>               | 296.0440 | Limonaketone sulfate           | (Surratt et al. 2008)     |                       |
| C <sub>10</sub> H <sub>16</sub> NO <sub>10</sub> S <sup>-</sup>             | 342.0495 | Limonaketone sulfate           | (Yassine et al. 2012)     |                       |
| C <sub>9</sub> H <sub>15</sub> O <sub>6</sub> S <sup>-</sup>                | 251.0589 | Limonaketone sulfate           | (Wang et al. 2017)        |                       |
| C <sub>10</sub> H <sub>15</sub> O <sub>5</sub> S <sup>-</sup>               | 247.0640 | α-Pinene sulfate               |                           | 0.81                  |
| C <sub>10</sub> H <sub>15</sub> O <sub>6</sub> S <sup>-</sup>               | 263.0589 | α-Pinene sulfate               |                           | 0.87                  |
| C <sub>10</sub> H <sub>17</sub> O <sub>6</sub> S <sup>-</sup>               | 265.0746 | α-Pinene sulfate               |                           | 0.94                  |

|                                        |          |                            |                           |      |
|----------------------------------------|----------|----------------------------|---------------------------|------|
| $C_{10}H_{17}O_8S^-$                   | 297.0644 | $\alpha$ -Pinene sulfate   |                           | 0.96 |
| $C_{10}H_{15}O_7S^-$                   | 279.0538 | $\alpha$ -Pinene sulfate   |                           | 0.97 |
| $C_{10}H_{15}O_8S^-$                   | 295.0488 | $\alpha$ -Pinene sulfate   |                           | 0.98 |
| $C_{10}H_{17}NO_9S^-$                  | 326.0546 | $\alpha$ -Pinene sulfate   |                           | 0.85 |
| <b>C<sub>2</sub>-C<sub>3</sub> OSs</b> |          |                            |                           |      |
| $C_3H_5O_4S^-$                         | 136.9909 | GAS                        | (Yassine et al. 2012)     |      |
| $C_2H_3O_5S^-$                         | 138.9701 | GAS                        | (Yassine et al. 2012)     |      |
| $C_3H_5O_5S^-$                         | 152.9858 | GAS                        | (Hettiyadura et al. 2015) |      |
| $C_2H_3O_6S^-$                         | 154.9650 | GAS                        | (Olson et al. 2011)       |      |
| $C_3H_7O_5S^-$                         | 155.0014 | GAS                        | (Hettiyadura et al. 2019) |      |
| $C_3H_5O_6S^-$                         | 168.9807 | LAS                        | (Olson et al. 2011)       |      |
| <b>Aliphatic-OSs</b>                   |          |                            |                           |      |
| $C_8H_{17}O_4S^-$                      | 210.0926 | Sodium octyl Sulfate (SOS) | (Wang et al. 2021a)       |      |
| $C_{12}H_{21}O_7S^-$                   | 309.1008 | SOS                        |                           | 0.94 |
| $C_{14}H_{29}O_5S^-$                   | 309.1736 | SOS                        |                           | 0.79 |
| $C_{16}H_{33}O_5S^-$                   | 337.2049 | SOS                        |                           | 0.93 |
| $C_6H_{13}O_4S^-$                      | 181.0535 | SOS                        |                           | 0.98 |
| $C_7H_{15}O_4S^-$                      | 195.0691 | SOS                        |                           | 0.91 |
| $C_7H_{15}O_5S^-$                      | 211.064  | SOS                        |                           | 0.89 |
| $C_9H_{19}O_4S^-$                      | 223.1004 | SOS                        |                           | 0.70 |
| $C_{10}H_{21}O_4S^-$                   | 237.1161 | SOS                        |                           | 0.7  |
| $C_{24}H_{51}N_2O_{13}S^-$             | 607.3112 | SOS                        |                           | 0.79 |
| $C_7H_{13}O_5S^-$                      | 209.0484 | SOS                        |                           | 0.86 |
| $C_9H_{17}O_5S^-$                      | 237.0797 | SOS                        |                           | 0.89 |
| $C_{10}H_{19}O_5S^-$                   | 251.0953 | SOS                        |                           | 0.70 |
| $C_9H_{17}O_7S^-$                      | 269.0695 | SOS                        |                           | 0.72 |
| $C_{12}H_{23}O_5S^-$                   | 279.1266 | SOS                        |                           | 0.90 |
| $C_9H_{17}O_4S^-$                      | 221.0848 | SOS                        |                           | 0.68 |
| $C_{10}H_{19}O_5S^-$                   | 251.0953 | SOS                        |                           | 0.72 |
| $C_9H_{17}O_6S^-$                      | 253.0746 | SOS                        |                           | 0.90 |
| $C_{11}H_{21}O_5S^-$                   | 265.1110 | SOS                        |                           | 0.68 |
| $C_{10}H_{19}O_6S^-$                   | 267.0902 | SOS                        |                           | 0.73 |
| $C_{13}H_{25}O_5S^-$                   | 293.1423 | SOS                        |                           | 0.84 |
| $C_{14}H_{27}O_5S^-$                   | 307.1579 | SOS                        |                           | 0.94 |
| $C_{13}H_{25}O_6S^-$                   | 309.1372 | SOS                        |                           | 0.72 |
| $C_{14}H_{27}O_6S^-$                   | 323.1528 | SOS                        |                           | 0.75 |
| $C_{16}H_{31}O_5S^-$                   | 335.1892 | SOS                        |                           | 0.96 |
| $C_{17}H_{33}O_5S^-$                   | 349.2049 | SOS                        |                           | 0.94 |
| $C_{16}H_{31}O_6S^-$                   | 351.1841 | SOS                        |                           | 0.7  |
| $C_{18}H_{35}O_5S^-$                   | 363.2205 | SOS                        |                           | 0.76 |

|                         |          |                |                     |      |
|-------------------------|----------|----------------|---------------------|------|
| $C_{21}H_{41}O_5S^-$    | 405.2675 | SOS            |                     | 0.94 |
| $C_8H_{15}O_5S^-$       | 223.0640 | SOS            |                     | 0.69 |
| $C_7H_{13}O_6S^-$       | 225.0433 | SOS            |                     | 0.76 |
| $C_6H_{11}O_7S^-$       | 227.0225 | SOS            |                     | 0.94 |
| $C_8H_{15}O_6S^-$       | 239.0589 | SOS            |                     | 0.89 |
| $C_6H_{11}O_8S^-$       | 243.0175 | SOS            |                     | 0.87 |
| $C_{11}H_{21}O_5S^-$    | 265.1110 | SOS            |                     | 0.69 |
| $C_{10}H_{19}O_6S^-$    | 267.0902 | SOS            |                     | 0.88 |
| $C_7H_{13}O_9S^-$       | 273.0280 | SOS            |                     | 0.70 |
| $C_{15}H_{29}O_5S^-$    | 321.1736 | SOS            |                     | 0.88 |
| $C_{26}H_{51}O_{12}S^-$ | 587.3101 | SOS            |                     | 0.95 |
| $C_{10}H_{17}O_6S^-$    | 265.0746 | SOS            |                     | 0.85 |
| $C_9H_{15}O_5S^-$       | 235.0640 | SOS            |                     | 0.95 |
| $C_{10}H_{17}O_5S^-$    | 249.0797 | SOS            |                     | 0.93 |
| $C_9H_{15}O_6S^-$       | 251.0589 | SOS            |                     | 0.91 |
| $C_{10}H_{17}O_6S^-$    | 265.0746 | SOS            |                     | 0.72 |
| $C_9H_{15}O_5S^-$       | 235.0640 | SOS            |                     | 0.98 |
| $C_{10}H_{17}O_5S^-$    | 249.0797 | SOS            |                     | 0.94 |
| $C_9H_{15}O_6S^-$       | 251.0589 | SOS            |                     | 0.92 |
| $C_{10}H_{17}O_6S^-$    | 265.0746 | SOS            |                     | 0.69 |
| $C_{11}H_{19}O_6S^-$    | 279.0902 | SOS            |                     | 0.78 |
| $C_{12}H_{21}O_6S^-$    | 293.1059 | SOS            |                     | 0.72 |
| $C_{14}H_{25}O_6S^-$    | 321.1372 | SOS            |                     | 0.63 |
| $C_8H_{13}O_6S^-$       | 237.0433 | SOS            |                     | 0.75 |
| $C_9H_{15}O_7S^-$       | 267.0538 | SOS            |                     | 0.73 |
| <b>Aromatic-OSs</b>     |          |                |                     |      |
| $C_6H_5O_4S^-$          | 172.9909 | Methyl sulfate | (Wang et al. 2021a) |      |
| $C_7H_7SO_4S^-$         | 218.9786 | Methyl sulfate | (Wang et al. 2021a) |      |
| $C_{11}H_{19}O_{11}S^-$ | 359.0648 | Methyl sulfate |                     | 0.77 |
| $C_{10}H_{17}O_{12}S^-$ | 361.0441 | Methyl sulfate |                     | 0.64 |
| $C_7H_{11}O_9S^-$       | 271.0124 | Methyl sulfate |                     | 0.65 |
| $C_7H_{11}O_{10}S^-$    | 287.0073 | Methyl sulfate |                     | 0.69 |
| $C_8H_{13}O_9S^-$       | 285.0280 | Methyl sulfate |                     | 0.70 |
| $C_8H_{13}O_{10}S^-$    | 301.0229 | Methyl sulfate |                     | 0.81 |
| $C_{11}H_{17}O_{11}S^-$ | 357.0492 | Methyl sulfate |                     | 0.86 |
| $C_8H_{12}NO_{11}S^-$   | 330.0131 | Methyl sulfate |                     | 0.90 |
| $C_8H_7O_5S^-$          | 215.0014 | Methyl sulfate |                     | 0.91 |
| $C_8H_7NO_5S^-$         | 229.0045 | Methyl sulfate |                     | 0.89 |
| $C_8H_7O_4S^-$          | 199.0065 | Methyl sulfate |                     | 0.98 |
| $C_9H_7O_7S^-$          | 258.9912 | Methyl sulfate |                     | 0.89 |
| $C_9H_7O_6S^-$          | 242.9963 | Methyl sulfate |                     | 0.74 |

|                                                                  |          |                |                      |
|------------------------------------------------------------------|----------|----------------|----------------------|
| C <sub>34</sub> H <sub>49</sub> O <sub>5</sub> S <sup>-</sup>    | 569.3301 | Methyl sulfate | 0.64                 |
| C <sub>43</sub> H <sub>63</sub> O <sub>5</sub> S <sup>-</sup>    | 691.4396 | Methyl sulfate | 0.72                 |
| C <sub>7</sub> H <sub>11</sub> O <sub>9</sub> S <sup>-</sup>     | 271.0124 | Methyl sulfate | 0.74                 |
| C <sub>10</sub> H <sub>7</sub> O <sub>11</sub> S <sup>-</sup>    | 334.9709 | Methyl sulfate | 0.86                 |
| C <sub>10</sub> H <sub>5</sub> O <sub>11</sub> S <sup>-</sup>    | 332.9553 | Methyl sulfate | 0.77                 |
| C <sub>10</sub> H <sub>5</sub> O <sub>10</sub> S <sup>-</sup>    | 316.9603 | Methyl sulfate | 0.72                 |
| C <sub>12</sub> H <sub>7</sub> O <sub>13</sub> S <sup>-</sup>    | 390.9607 | Methyl sulfate | 0.65                 |
| C <sub>8</sub> H <sub>7</sub> O <sub>5</sub> S <sup>-</sup>      | 215.0014 | Methyl sulfate | 0.77                 |
| C <sub>7</sub> H <sub>5</sub> SO <sub>5</sub> S <sup>-</sup>     | 200.9858 | Methyl sulfate | 0.65                 |
| C <sub>9</sub> H <sub>9</sub> O <sub>4</sub> S <sup>-</sup>      | 213.0222 | Methyl sulfate | 0.72                 |
| C <sub>7</sub> H <sub>6</sub> SO <sub>4</sub> S <sup>-</sup>     | 185.9987 | Methyl sulfate | 0.73                 |
| C <sub>18</sub> H <sub>13</sub> O <sub>6</sub> S <sup>-</sup>    | 357.0433 | Methyl sulfate | 0.69                 |
| C <sub>23</sub> H <sub>19</sub> O <sub>7</sub> S <sup>-</sup>    | 439.0851 | Methyl sulfate | 0.65                 |
| C <sub>25</sub> H <sub>21</sub> O <sub>7</sub> S <sup>-</sup>    | 465.1008 | Methyl sulfate | 0.77                 |
| C <sub>24</sub> H <sub>17</sub> O <sub>4</sub> S <sup>-</sup>    | 401.0848 | Methyl sulfate | 0.73                 |
| C <sub>27</sub> H <sub>21</sub> O <sub>7</sub> S <sup>-</sup>    | 489.1008 | Methyl sulfate | 0.90                 |
| C <sub>12</sub> H <sub>21</sub> N <sub>2</sub> O <sub>11</sub> S | 401.0866 | Methyl sulfate | 0.77                 |
| <b>OS<sub>a</sub>-other</b>                                      |          |                |                      |
| C <sub>4</sub> H <sub>7</sub> O <sub>4</sub> S <sup>-</sup>      | 151.0065 | Methyl sulfate | (Wang et al. 2021a)  |
| C <sub>5</sub> H <sub>7</sub> O <sub>6</sub> S <sup>-</sup>      | 194.9963 | GAS            | (Wang et al. 2021a)  |
| C <sub>6</sub> H <sub>9</sub> O <sub>6</sub> S <sup>-</sup>      | 209.0120 | GAS            | (Berndt et al. 2016) |

83 <sup>a</sup>Unreported OSs were further identified through correlation analysis between unreported OSs and known  
84 OSs. Aliphatic and aromatic OSs were referred to anthropogenic OSs (OS<sub>a</sub>). The compounds were  
85 adopted with R value greater than 0.6. Details were shown in **Sect. S1** (Classification of OSs).

86

87

88

89

90

91

92

93

94



95 **Table S2.** The mean mass concentrations ( $\pm$  SD) of identified OS<sub>i</sub>, OS<sub>m</sub>, and C<sub>2</sub>-C<sub>3</sub> OSs  
 96 in PM<sub>2.5</sub> collected in urban and suburban Shanghai in daytime and nighttime.

| Formula [M <sup>-</sup> H] <sup>-</sup>                                     | MW (Da)  | Urban (ng m <sup>-3</sup> ) |               | Suburban (ng m <sup>-3</sup> ) |               |
|-----------------------------------------------------------------------------|----------|-----------------------------|---------------|--------------------------------|---------------|
|                                                                             |          | Daytime                     | Nighttime     | Daytime                        | Nighttime     |
| <b>Isoprene-derived OSs</b>                                                 |          |                             |               |                                |               |
| C <sub>4</sub> H <sub>7</sub> O <sub>5</sub> S <sup>-</sup>                 | 167.0014 | 0.70 ± 0.75                 | 0.49 ± 0.55   | 0.53 ± 0.44                    | 0.34 ± 0.17   |
| C <sub>4</sub> H <sub>7</sub> O <sub>6</sub> S <sup>-</sup>                 | 182.9963 | 5.93 ± 6.30                 | 1.94 ± 2.83   | 3.80 ± 4.18                    | 0.96 ± 1.13   |
| C <sub>5</sub> H <sub>9</sub> O <sub>6</sub> S <sup>-</sup>                 | 197.0120 | 4.36 ± 5.49                 | 1.93 ± 2.95   | 2.20 ± 2.51                    | 1.26 ± 1.52   |
| C <sub>4</sub> H <sub>7</sub> O <sub>7</sub> S <sup>-</sup>                 | 198.9912 | 6.09 ± 7.93                 | 2.20 ± 3.56   | 3.20 ± 4.19                    | 1.30 ± 1.76   |
| C <sub>5</sub> H <sub>11</sub> O <sub>6</sub> S <sup>-</sup>                | 199.0276 | 1.60 ± 2.46                 | 0.66 ± 0.96   | 0.77 ± 0.94                    | 0.39 ± 0.41   |
| C <sub>5</sub> H <sub>7</sub> O <sub>7</sub> S <sup>-</sup>                 | 210.9912 | 11.99 ± 16.15               | 4.88 ± 6.49   | 6.38 ± 7.97                    | 3.67 ± 4.46   |
| C <sub>5</sub> H <sub>9</sub> O <sub>7</sub> S <sup>-</sup>                 | 213.0069 | 12.32 ± 12.2                | 6.91 ± 4.83   | 9.47 ± 4.36                    | 6.61 ± 2.05   |
| C <sub>5</sub> H <sub>11</sub> O <sub>7</sub> S <sup>-</sup>                | 215.0225 | 53.44 ± 72.16               | 22.74 ± 36.10 | 25.64 ± 28.99                  | 13.91 ± 14.14 |
| C <sub>7</sub> H <sub>9</sub> O <sub>7</sub> S <sup>-</sup>                 | 237.0069 | 0.81 ± 1.01                 | 0.44 ± 0.85   | 0.46 ± 0.51                    | 0.29 ± 0.44   |
| C <sub>5</sub> H <sub>7</sub> O <sub>8</sub> S <sup>-</sup>                 | 226.9862 | 9.89 ± 10.69                | 4.58 ± 5.60   | 6.22 ± 6.87                    | 2.13 ± 3.01   |
| C <sub>5</sub> H <sub>9</sub> O <sub>8</sub> S <sup>-</sup>                 | 229.0018 | 4.47 ± 5.96                 | 2.29 ± 3.67   | 2.09 ± 2.64                    | 0.98 ± 1.37   |
| C <sub>4</sub> H <sub>7</sub> O <sub>8</sub> S <sup>-</sup>                 | 214.9862 | 0.52 ± 0.46                 | 0.40 ± 0.44   | 0.53 ± 0.54                    | 0.26 ± 0.29   |
| C <sub>4</sub> H <sub>5</sub> O <sub>7</sub> S <sup>-</sup>                 | 196.9756 | 0.48 ± 0.31                 | 0.34 ± 0.27   | 0.44 ± 0.31                    | 0.33 ± 0.19   |
| C <sub>4</sub> H <sub>6</sub> NO <sub>9</sub> S <sup>-</sup>                | 243.9763 | 0.18 ± 0.19                 | 0.13 ± 0.07   | 0.13 ± 0.01                    | 0.11 ± 0.01   |
| C <sub>4</sub> H <sub>8</sub> NO <sub>7</sub> S <sup>-</sup>                | 214.0021 | 0.38 ± 0.47                 | 0.23 ± 0.24   | 0.25 ± 0.17                    | 0.18 ± 0.11   |
| C <sub>5</sub> H <sub>8</sub> NO <sub>7</sub> S <sup>-</sup>                | 226.0021 | 0.49 ± 0.83                 | 0.17 ± 0.20   | 0.28 ± 0.28                    | 0.15 ± 0.09   |
| C <sub>5</sub> H <sub>10</sub> NO <sub>9</sub> S <sup>-</sup>               | 260.0076 | 1.79 ± 3.03                 | 0.95 ± 2.06   | 0.49 ± 0.86                    | 0.37 ± 0.71   |
| C <sub>5</sub> H <sub>8</sub> NO <sub>10</sub> S <sup>-</sup>               | 273.9869 | 1.14 ± 2.09                 | 0.73 ± 1.47   | 0.41 ± 0.44                    | 0.23 ± 0.35   |
| C <sub>5</sub> H <sub>9</sub> N <sub>2</sub> O <sub>11</sub> S <sup>-</sup> | 260.0076 | 1.02 ± 1.96                 | 3.06 ± 6.16   | 0.37 ± 0.42                    | 0.82 ± 1.60   |
| <b>Monoterpene-derived OSs</b>                                              |          |                             |               |                                |               |
| C <sub>7</sub> H <sub>11</sub> O <sub>6</sub> S <sup>-</sup>                | 223.0276 | 8.24 ± 12.05                | 3.07 ± 4.24   | 4.13 ± 5.16                    | 1.82 ± 1.72   |
| C <sub>7</sub> H <sub>11</sub> O <sub>7</sub> S <sup>-</sup>                | 239.0225 | 11.04 ± 17.59               | 3.29 ± 5.02   | 4.40 ± 5.84                    | 1.69 ± 1.61   |
| C <sub>10</sub> H <sub>17</sub> O <sub>5</sub> S <sup>-</sup>               | 249.0797 | 0.20 ± 0.20                 | 0.11 ± 0.05   | 0.16 ± 0.05                    | 0.10 ± 0.05   |
| C <sub>9</sub> H <sub>15</sub> O <sub>6</sub> S <sup>-</sup>                | 251.0589 | 0.47 ± 0.47                 | 0.31 ± 0.21   | 0.30 ± 0.16                    | 0.22 ± 0.09   |
| C <sub>8</sub> H <sub>13</sub> O <sub>7</sub> S <sup>-</sup>                | 253.0382 | 10.33 ± 16.91               | 3.18 ± 4.92   | 4.35 ± 5.81                    | 8.71 ± 25.31  |
| C <sub>10</sub> H <sub>15</sub> O <sub>7</sub> S <sup>-</sup>               | 279.0538 | 8.24 ± 12.34                | 4.94 ± 6.61   | 4.68 ± 4.50                    | 2.88 ± 2.64   |
| C <sub>10</sub> H <sub>17</sub> O <sub>7</sub> S <sup>-</sup>               | 281.0695 | 0.14 ± 0.09                 | 0.10 ± 0.03   | 0.14 ± 0.03                    | 0.10 ± 0.01   |
| C <sub>10</sub> H <sub>15</sub> O <sub>5</sub> S <sup>-</sup>               | 247.0640 | 0.07 ± 0.02                 | 0.08 ± 0.03   | 0.08 ± 0.01                    | 0.07 ± 0.01   |
| C <sub>10</sub> H <sub>15</sub> O <sub>6</sub> S <sup>-</sup>               | 263.0589 | 0.04 ± 0.05                 | 0.04 ± 0.04   | 0.03 ± 0.04                    | 0.05 ± 0.03   |
| C <sub>10</sub> H <sub>17</sub> O <sub>6</sub> S <sup>-</sup>               | 265.0746 | 0.08 ± 0.03                 | 0.06 ± 0.01   | 0.07 ± 0.02                    | 0.06 ± 0.01   |
| C <sub>10</sub> H <sub>17</sub> O <sub>8</sub> S <sup>-</sup>               | 297.0644 | 0.13 ± 0.05                 | 0.10 ± 0.02   | 0.13 ± 0.02                    | 0.11 ± 0.01   |
| C <sub>10</sub> H <sub>15</sub> O <sub>7</sub> S <sup>-</sup>               | 279.0538 | 0.19 ± 0.14                 | 0.13 ± 0.06   | 0.16 ± 0.04                    | 0.12 ± 0.02   |
| C <sub>10</sub> H <sub>15</sub> O <sub>8</sub> S <sup>-</sup>               | 295.0488 | 0.13 ± 0.06                 | 0.10 ± 0.02   | 0.14 ± 0.01                    | 0.11 ± 0.01   |
| C <sub>10</sub> H <sub>17</sub> NO <sub>9</sub> S <sup>-</sup>              | 326.0546 | 0.16 ± 0.07                 | 0.13 ± 0.07   | 0.16 ± 0.03                    | 0.12 ± 0.03   |
| C <sub>10</sub> H <sub>16</sub> NO <sub>7</sub> S <sup>-</sup>              | 294.0647 | 0.34 ± 0.3                  | 1.98 ± 1.89   | 0.24 ± 0.14                    | 0.87 ± 0.58   |
| C <sub>9</sub> H <sub>14</sub> NO <sub>8</sub> S <sup>-</sup>               | 296.0440 | 0.12 ± 0.11                 | 0.39 ± 0.23   | 0.12 ± 0.11                    | 0.26 ± 0.07   |
| C <sub>10</sub> H <sub>16</sub> NO <sub>10</sub> S <sup>-</sup>             | 342.0495 | 0.22 ± 0.20                 | 0.41 ± 0.41   | 0.17 ± 0.14                    | 0.26 ± 0.13   |
| <b>C<sub>2</sub>-C<sub>3</sub> OSs</b>                                      |          |                             |               |                                |               |
| C <sub>3</sub> H <sub>5</sub> O <sub>4</sub> S <sup>-</sup>                 | 136.9909 | 1.36 ± 0.94                 | 0.98 ± 0.59   | 1.17 ± 0.48                    | 0.95 ± 0.37   |
| C <sub>2</sub> H <sub>3</sub> O <sub>5</sub> S <sup>-</sup>                 | 138.9701 | 1.73 ± 1.13                 | 1.69 ± 1.25   | 1.70 ± 0.64                    | 1.60 ± 1.17   |
| C <sub>3</sub> H <sub>5</sub> O <sub>5</sub> S <sup>-</sup>                 | 152.9858 | 9.33 ± 10.64                | 4.51 ± 4.51   | 5.91 ± 5.50                    | 3.18 ± 2.54   |
| C <sub>2</sub> H <sub>3</sub> O <sub>6</sub> S <sup>-</sup>                 | 154.9650 | 9.69 ± 8.65                 | 4.55 ± 4.55   | 6.89 ± 6.07                    | 4.07 ± 3.58   |
| C <sub>3</sub> H <sub>7</sub> O <sub>5</sub> S <sup>-</sup>                 | 155.0014 | 1.44 ± 1.07                 | 1.69 ± 1.42   | 1.76 ± 1.28                    | 1.37 ± 0.93   |
| C <sub>3</sub> H <sub>5</sub> O <sub>6</sub> S <sup>-</sup>                 | 168.9807 | 3.19 ± 2.61                 | 2.18 ± 3.08   | 2.64 ± 1.94                    | 1.60 ± 0.88   |

97  
 98  
 99  
 100  
 101  
 102  
 103

104  
105

**Table S3.** The mean mass concentrations ( $\pm$  SD) of identified anthropogenic OSs in PM<sub>2.5</sub> collected in urban and suburban Shanghai in daytime and nighttime.

| Formula [MH] <sup>-</sup>                                                     | MW (Da)  | Urban (ng m <sup>-3</sup> ) |             | Suburban (ng m <sup>-3</sup> ) |             |
|-------------------------------------------------------------------------------|----------|-----------------------------|-------------|--------------------------------|-------------|
|                                                                               |          | Daytime                     | Nighttime   | Daytime                        | Nighttime   |
| <b>Aliphatic-OSs<sup>a</sup></b>                                              |          |                             |             |                                |             |
| C <sub>12</sub> H <sub>21</sub> O <sub>7</sub> S <sup>-</sup>                 | 309.1008 | 0.13 ± 0.09                 | 0.10 ± 0.05 | 0.12 ± 0.03                    | 0.10 ± 0.02 |
| C <sub>8</sub> H <sub>17</sub> O <sub>4</sub> S <sup>-</sup>                  | 210.0926 | 0.12 ± 0.03                 | 0.13 ± 0.05 | 0.10 ± 0.02                    | 0.08 ± 0.01 |
| C <sub>14</sub> H <sub>29</sub> O <sub>5</sub> S <sup>-</sup>                 | 309.1736 | 0.07 ± 0.01                 | 0.06 ± 0.01 | 0.08 ± 0.01                    | 0.07 ± 0.01 |
| C <sub>16</sub> H <sub>33</sub> O <sub>5</sub> S <sup>-</sup>                 | 337.2049 | 0.06 ± 0.01                 | 0.05 ± 0.01 | 0.07 ± 0.01                    | 0.06 ± 0.01 |
| C <sub>6</sub> H <sub>13</sub> O <sub>4</sub> S <sup>-</sup>                  | 181.0535 | 0.05 ± 0.01                 | 0.05 ± 0.01 | 0.07 ± 0.01                    | 0.05 ± 0.01 |
| C <sub>7</sub> H <sub>15</sub> O <sub>4</sub> S <sup>-</sup>                  | 195.0691 | 0.06 ± 0.01                 | 0.06 ± 0.01 | 0.07 ± 0.01                    | 0.06 ± 0.01 |
| C <sub>7</sub> H <sub>15</sub> O <sub>5</sub> S <sup>-</sup>                  | 211.064  | 0.06 ± 0.01                 | 0.05 ± 0.01 | 0.07 ± 0.01                    | 0.06 ± 0.01 |
| C <sub>9</sub> H <sub>19</sub> O <sub>4</sub> S <sup>-</sup>                  | 223.1004 | 0.07 ± 0.01                 | 0.06 ± 0.01 | 0.08 ± 0.01                    | 0.07 ± 0.01 |
| C <sub>10</sub> H <sub>21</sub> O <sub>4</sub> S <sup>-</sup>                 | 237.1161 | 0.08 ± 0.01                 | 0.08 ± 0.02 | 0.10 ± 0.01                    | 0.09 ± 0.01 |
| C <sub>24</sub> H <sub>51</sub> N <sub>2</sub> O <sub>13</sub> S <sup>-</sup> | 607.3112 | 0.06 ± 0.01                 | 0.05 ± 0.01 | 0.07 ± 0.01                    | 0.05 ± 0.01 |
| C <sub>7</sub> H <sub>13</sub> O <sub>5</sub> S <sup>-</sup>                  | 209.0484 | 0.08 ± 0.03                 | 0.06 ± 0.02 | 0.08 ± 0.02                    | 0.06 ± 0.01 |
| C <sub>9</sub> H <sub>17</sub> O <sub>5</sub> S <sup>-</sup>                  | 237.0797 | 0.14 ± 0.08                 | 0.08 ± 0.03 | 0.11 ± 0.05                    | 0.07 ± 0.02 |
| C <sub>10</sub> H <sub>19</sub> O <sub>5</sub> S <sup>-</sup>                 | 251.0953 | 0.15 ± 0.25                 | 0.06 ± 0.02 | 0.08 ± 0.02                    | 0.06 ± 0.01 |
| C <sub>9</sub> H <sub>17</sub> O <sub>7</sub> S <sup>-</sup>                  | 269.0695 | 0.07 ± 0.03                 | 0.05 ± 0.01 | 0.07 ± 0.01                    | 0.06 ± 0.01 |
| C <sub>12</sub> H <sub>23</sub> O <sub>5</sub> S <sup>-</sup>                 | 279.1266 | 0.28 ± 0.24                 | 0.18 ± 0.14 | 0.16 ± 0.10                    | 0.09 ± 0.04 |
| C <sub>9</sub> H <sub>17</sub> O <sub>4</sub> S <sup>-</sup>                  | 221.0848 | 0.09 ± 0.02                 | 0.07 ± 0.01 | 0.10 ± 0.02                    | 0.07 ± 0.01 |
| C <sub>10</sub> H <sub>19</sub> O <sub>5</sub> S <sup>-</sup>                 | 251.0953 | 0.15 ± 0.25                 | 0.06 ± 0.02 | 0.08 ± 0.02                    | 0.06 ± 0.01 |
| C <sub>9</sub> H <sub>17</sub> O <sub>6</sub> S <sup>-</sup>                  | 253.0746 | 0.08 ± 0.04                 | 0.06 ± 0.02 | 0.08 ± 0.01                    | 0.06 ± 0.01 |
| C <sub>11</sub> H <sub>21</sub> O <sub>5</sub> S <sup>-</sup>                 | 265.1110 | 0.17 ± 0.13                 | 0.13 ± 0.08 | 0.14 ± 0.08                    | 0.09 ± 0.03 |
| C <sub>10</sub> H <sub>19</sub> O <sub>6</sub> S <sup>-</sup>                 | 267.0902 | 0.07 ± 0.02                 | 0.05 ± 0.01 | 0.07 ± 0.01                    | 0.06 ± 0.01 |
| C <sub>13</sub> H <sub>25</sub> O <sub>5</sub> S <sup>-</sup>                 | 293.1423 | 0.31 ± 0.27                 | 0.20 ± 0.16 | 0.16 ± 0.08                    | 0.11 ± 0.04 |
| C <sub>14</sub> H <sub>27</sub> O <sub>5</sub> S <sup>-</sup>                 | 307.1579 | 0.25 ± 0.25                 | 0.13 ± 0.09 | 0.11 ± 0.05                    | 0.08 ± 0.02 |
| C <sub>13</sub> H <sub>25</sub> O <sub>6</sub> S <sup>-</sup>                 | 309.1372 | 0.06 ± 0.01                 | 0.05 ± 0.01 | 0.07 ± 0.01                    | 0.06 ± 0.01 |
| C <sub>14</sub> H <sub>27</sub> O <sub>6</sub> S <sup>-</sup>                 | 323.1528 | 0.06 ± 0.01                 | 0.05 ± 0.01 | 0.07 ± 0.01                    | 0.06 ± 0.01 |
| C <sub>16</sub> H <sub>31</sub> O <sub>5</sub> S <sup>-</sup>                 | 335.1892 | 0.05 ± 0.01                 | 0.05 ± 0.01 | 0.07 ± 0.01                    | 0.06 ± 0.01 |
| C <sub>17</sub> H <sub>33</sub> O <sub>5</sub> S <sup>-</sup>                 | 349.2049 | 0.07 ± 0.01                 | 0.08 ± 0.02 | 0.11 ± 0.03                    | 0.13 ± 0.05 |
| C <sub>16</sub> H <sub>31</sub> O <sub>6</sub> S <sup>-</sup>                 | 351.1841 | 0.08 ± 0.03                 | 0.06 ± 0.01 | 0.08 ± 0.01                    | 0.06 ± 0.01 |
| C <sub>18</sub> H <sub>35</sub> O <sub>5</sub> S <sup>-</sup>                 | 363.2205 | 0.05 ± 0.01                 | 0.05 ± 0.01 | 0.07 ± 0.01                    | 0.05 ± 0.01 |
| C <sub>21</sub> H <sub>41</sub> O <sub>5</sub> S <sup>-</sup>                 | 405.2675 | 0.06 ± 0.01                 | 0.05 ± 0.01 | 0.08 ± 0.01                    | 0.06 ± 0.01 |
| C <sub>8</sub> H <sub>15</sub> O <sub>5</sub> S <sup>-</sup>                  | 223.0640 | 0.08 ± 0.02                 | 0.06 ± 0.02 | 0.08 ± 0.01                    | 0.06 ± 0.01 |
| C <sub>7</sub> H <sub>13</sub> O <sub>6</sub> S <sup>-</sup>                  | 225.0433 | 0.06 ± 0.02                 | 0.05 ± 0.01 | 0.07 ± 0.01                    | 0.06 ± 0.01 |
| C <sub>6</sub> H <sub>11</sub> O <sub>7</sub> S <sup>-</sup>                  | 227.0225 | 0.07 ± 0.04                 | 0.05 ± 0.01 | 0.07 ± 0.01                    | 0.05 ± 0.01 |
| C <sub>8</sub> H <sub>15</sub> O <sub>6</sub> S <sup>-</sup>                  | 239.0589 | 0.08 ± 0.03                 | 0.06 ± 0.01 | 0.08 ± 0.01                    | 0.06 ± 0.01 |
| C <sub>6</sub> H <sub>11</sub> O <sub>8</sub> S <sup>-</sup>                  | 243.0175 | 0.05 ± 0.01                 | 0.05 ± 0.01 | 0.07 ± 0.01                    | 0.05 ± 0.01 |
| C <sub>11</sub> H <sub>21</sub> O <sub>5</sub> S <sup>-</sup>                 | 265.1110 | 0.11 ± 0.05                 | 0.09 ± 0.03 | 0.11 ± 0.02                    | 0.09 ± 0.02 |
| C <sub>10</sub> H <sub>19</sub> O <sub>6</sub> S <sup>-</sup>                 | 267.0902 | 0.06 ± 0.01                 | 0.05 ± 0.01 | 0.07 ± 0.01                    | 0.05 ± 0.01 |
| C <sub>7</sub> H <sub>13</sub> O <sub>9</sub> S <sup>-</sup>                  | 273.0280 | 0.05 ± 0.01                 | 0.05 ± 0.01 | 0.07 ± 0.01                    | 0.05 ± 0.01 |
| C <sub>15</sub> H <sub>29</sub> O <sub>5</sub> S <sup>-</sup>                 | 321.1736 | 0.15 ± 0.16                 | 0.07 ± 0.04 | 0.08 ± 0.02                    | 0.06 ± 0.01 |
| C <sub>26</sub> H <sub>51</sub> O <sub>12</sub> S <sup>-</sup>                | 587.3101 | 0.08 ± 0.02                 | 0.05 ± 0.01 | 0.07 ± 0.01                    | 0.06 ± 0.01 |
| C <sub>10</sub> H <sub>17</sub> O <sub>6</sub> S <sup>-</sup>                 | 265.0746 | 0.07 ± 0.02                 | 0.05 ± 0.01 | 0.07 ± 0.01                    | 0.06 ± 0.01 |
| C <sub>9</sub> H <sub>15</sub> O <sub>5</sub> S <sup>-</sup>                  | 235.0640 | 0.10 ± 0.04                 | 0.06 ± 0.02 | 0.09 ± 0.02                    | 0.06 ± 0.01 |
| C <sub>10</sub> H <sub>17</sub> O <sub>5</sub> S <sup>-</sup>                 | 249.0797 | 0.07 ± 0.02                 | 0.06 ± 0.01 | 0.08 ± 0.01                    | 0.06 ± 0.01 |
| C <sub>9</sub> H <sub>15</sub> O <sub>6</sub> S <sup>-</sup>                  | 251.0589 | 0.08 ± 0.05                 | 0.06 ± 0.02 | 0.08 ± 0.02                    | 0.06 ± 0.01 |
| C <sub>10</sub> H <sub>17</sub> O <sub>6</sub> S <sup>-</sup>                 | 265.0746 | 0.07 ± 0.02                 | 0.05 ± 0.01 | 0.07 ± 0.01                    | 0.06 ± 0.01 |
| C <sub>11</sub> H <sub>19</sub> O <sub>6</sub> S <sup>-</sup>                 | 279.0902 | 0.07 ± 0.02                 | 0.05 ± 0.01 | 0.07 ± 0.01                    | 0.06 ± 0.01 |
| C <sub>12</sub> H <sub>21</sub> O <sub>6</sub> S <sup>-</sup>                 | 293.1059 | 0.06 ± 0.01                 | 0.05 ± 0.01 | 0.07 ± 0.01                    | 0.05 ± 0.01 |
| C <sub>14</sub> H <sub>25</sub> O <sub>6</sub> S <sup>-</sup>                 | 321.1372 | 0.18 ± 0.19                 | 0.08 ± 0.04 | 0.09 ± 0.02                    | 0.07 ± 0.01 |
| C <sub>8</sub> H <sub>13</sub> O <sub>6</sub> S <sup>-</sup>                  | 237.0433 | 0.08 ± 0.03                 | 0.06 ± 0.02 | 0.09 ± 0.02                    | 0.07 ± 0.02 |
| C <sub>9</sub> H <sub>15</sub> O <sub>7</sub> S <sup>-</sup>                  | 267.0538 | 0.13 ± 0.14                 | 0.06 ± 0.04 | 0.08 ± 0.02                    | 0.06 ± 0.01 |

| <b>Aromatic-OSs</b>                                                           |          |             |             |             |             |
|-------------------------------------------------------------------------------|----------|-------------|-------------|-------------|-------------|
| C <sub>11</sub> H <sub>19</sub> O <sub>11</sub> S <sup>-</sup>                | 359.0648 | 0.14 ± 0.01 | 0.12 ± 0.01 | 0.18 ± 0.01 | 0.15 ± 0.01 |
| C <sub>10</sub> H <sub>17</sub> O <sub>12</sub> S <sup>-</sup>                | 361.0441 | 0.15 ± 0.02 | 0.12 ± 0.01 | 0.18 ± 0.01 | 0.15 ± 0.01 |
| C <sub>7</sub> H <sub>11</sub> O <sub>9</sub> S <sup>-</sup>                  | 271.0124 | 0.16 ± 0.04 | 0.13 ± 0.02 | 0.19 ± 0.02 | 0.15 ± 0.01 |
| C <sub>7</sub> H <sub>11</sub> O <sub>10</sub> S <sup>-</sup>                 | 287.0073 | 0.22 ± 0.10 | 0.15 ± 0.04 | 0.23 ± 0.06 | 0.17 ± 0.03 |
| C <sub>8</sub> H <sub>13</sub> O <sub>9</sub> S <sup>-</sup>                  | 285.0280 | 0.15 ± 0.01 | 0.12 ± 0.01 | 0.18 ± 0.02 | 0.15 ± 0.01 |
| C <sub>8</sub> H <sub>13</sub> O <sub>10</sub> S <sup>-</sup>                 | 301.0229 | 0.15 ± 0.02 | 0.12 ± 0.01 | 0.18 ± 0.01 | 0.15 ± 0.01 |
| C <sub>11</sub> H <sub>17</sub> O <sub>11</sub> S <sup>-</sup>                | 357.0492 | 0.14 ± 0.01 | 0.12 ± 0.01 | 0.18 ± 0.01 | 0.15 ± 0.01 |
| C <sub>8</sub> H <sub>12</sub> NO <sub>11</sub> S <sup>-</sup>                | 330.0131 | 0.15 ± 0.02 | 0.13 ± 0.02 | 0.19 ± 0.02 | 0.15 ± 0.01 |
| C <sub>7</sub> H <sub>7</sub> SO <sub>4</sub> S <sup>-</sup>                  | 218.9786 | 0.15 ± 0.01 | 0.13 ± 0.02 | 0.18 ± 0.01 | 0.15 ± 0.01 |
| C <sub>8</sub> H <sub>7</sub> O <sub>5</sub> S <sup>-</sup>                   | 215.0014 | 0.18 ± 0.05 | 0.15 ± 0.05 | 0.20 ± 0.03 | 0.16 ± 0.02 |
| C <sub>8</sub> H <sub>7</sub> NO <sub>5</sub> S <sup>-</sup>                  | 229.0045 | 0.14 ± 0.01 | 0.12 ± 0.01 | 0.17 ± 0.01 | 0.14 ± 0.01 |
| C <sub>8</sub> H <sub>7</sub> O <sub>4</sub> S <sup>-</sup>                   | 199.0065 | 0.15 ± 0.02 | 0.12 ± 0.01 | 0.18 ± 0.01 | 0.15 ± 0.01 |
| C <sub>9</sub> H <sub>7</sub> O <sub>7</sub> S <sup>-</sup>                   | 258.9912 | 0.14 ± 0.01 | 0.12 ± 0.01 | 0.18 ± 0.01 | 0.14 ± 0.01 |
| C <sub>9</sub> H <sub>7</sub> O <sub>6</sub> S <sup>-</sup>                   | 242.9963 | 0.14 ± 0.01 | 0.12 ± 0.01 | 0.18 ± 0.01 | 0.14 ± 0.01 |
| C <sub>34</sub> H <sub>49</sub> O <sub>5</sub> S <sup>-</sup>                 | 569.3301 | 1.34 ± 0.51 | 0.59 ± 0.35 | 0.26 ± 0.11 | 0.18 ± 0.02 |
| C <sub>43</sub> H <sub>63</sub> O <sub>5</sub> S <sup>-</sup>                 | 691.4396 | 0.27 ± 0.07 | 0.18 ± 0.06 | 0.19 ± 0.01 | 0.16 ± 0.01 |
| C <sub>7</sub> H <sub>11</sub> O <sub>9</sub> S <sup>-</sup>                  | 271.0124 | 0.24 ± 0.14 | 0.16 ± 0.08 | 0.22 ± 0.06 | 0.17 ± 0.04 |
| C <sub>10</sub> H <sub>7</sub> O <sub>11</sub> S <sup>-</sup>                 | 334.9709 | 0.20 ± 0.09 | 0.15 ± 0.07 | 0.20 ± 0.05 | 0.16 ± 0.03 |
| C <sub>10</sub> H <sub>5</sub> O <sub>11</sub> S <sup>-</sup>                 | 332.9553 | 0.15 ± 0.01 | 0.12 ± 0.01 | 0.18 ± 0.01 | 0.15 ± 0.01 |
| C <sub>10</sub> H <sub>5</sub> O <sub>10</sub> S <sup>-</sup>                 | 316.9603 | 0.15 ± 0.02 | 0.12 ± 0.01 | 0.18 ± 0.01 | 0.15 ± 0.01 |
| C <sub>12</sub> H <sub>7</sub> O <sub>13</sub> S <sup>-</sup>                 | 390.9607 | 0.14 ± 0.01 | 0.12 ± 0.01 | 0.18 ± 0.01 | 0.14 ± 0.01 |
| C <sub>8</sub> H <sub>7</sub> O <sub>5</sub> S <sup>-</sup>                   | 215.0014 | 0.20 ± 0.07 | 0.17 ± 0.06 | 0.22 ± 0.04 | 0.18 ± 0.03 |
| C <sub>7</sub> H <sub>5</sub> SO <sub>5</sub> S <sup>-</sup>                  | 200.9858 | 0.20 ± 0.07 | 0.15 ± 0.05 | 0.21 ± 0.04 | 0.17 ± 0.03 |
| C <sub>9</sub> H <sub>9</sub> O <sub>4</sub> S <sup>-</sup>                   | 213.0222 | 0.21 ± 0.08 | 0.16 ± 0.05 | 0.25 ± 0.06 | 0.17 ± 0.03 |
| C <sub>7</sub> H <sub>6</sub> SO <sub>4</sub> S <sup>-</sup>                  | 185.9987 | 0.16 ± 0.02 | 0.13 ± 0.01 | 0.18 ± 0.01 | 0.15 ± 0.01 |
| C <sub>18</sub> H <sub>13</sub> O <sub>6</sub> S <sup>-</sup>                 | 357.0433 | 0.14 ± 0.01 | 0.12 ± 0.01 | 0.18 ± 0.01 | 0.15 ± 0.01 |
| C <sub>23</sub> H <sub>19</sub> O <sub>7</sub> S <sup>-</sup>                 | 439.0851 | 0.19 ± 0.04 | 0.13 ± 0.01 | 0.21 ± 0.02 | 0.17 ± 0.01 |
| C <sub>25</sub> H <sub>21</sub> O <sub>7</sub> S <sup>-</sup>                 | 465.1008 | 0.14 ± 0.01 | 0.13 ± 0.03 | 0.17 ± 0.01 | 0.15 ± 0.01 |
| C <sub>24</sub> H <sub>17</sub> O <sub>4</sub> S <sup>-</sup>                 | 401.0848 | 0.19 ± 0.03 | 0.15 ± 0.02 | 0.23 ± 0.03 | 0.18 ± 0.01 |
| C <sub>27</sub> H <sub>21</sub> O <sub>7</sub> S <sup>-</sup>                 | 489.1008 | 0.14 ± 0.01 | 0.12 ± 0.01 | 0.17 ± 0.01 | 0.14 ± 0.01 |
| C <sub>6</sub> H <sub>5</sub> O <sub>4</sub> S <sup>-</sup>                   | 172.9909 | 0.15 ± 0.01 | 0.12 ± 0.01 | 0.18 ± 0.01 | 0.14 ± 0.01 |
| C <sub>7</sub> H <sub>7</sub> O <sub>4</sub> S <sup>-</sup>                   | 187.0065 | 0.15 ± 0.01 | 0.13 ± 0.02 | 0.18 ± 0.01 | 0.15 ± 0.01 |
| C <sub>12</sub> H <sub>21</sub> N <sub>2</sub> O <sub>11</sub> S <sup>-</sup> | 401.0866 | 0.19 ± 0.03 | 0.15 ± 0.02 | 0.23 ± 0.03 | 0.18 ± 0.01 |
| <b>OS<sub>a</sub>-other</b>                                                   |          |             |             |             |             |
| C <sub>4</sub> H <sub>7</sub> O <sub>4</sub> S <sup>-</sup>                   | 151.0065 | 0.93 ± 0.77 | 0.83 ± 1.17 | 0.55 ± 0.43 | 0.44 ± 0.50 |
| C <sub>5</sub> H <sub>7</sub> O <sub>6</sub> S <sup>-</sup>                   | 194.9963 | 3.68 ± 3.75 | 1.80 ± 1.66 | 2.29 ± 1.80 | 1.35 ± 0.72 |
| C <sub>6</sub> H <sub>9</sub> O <sub>6</sub> S <sup>-</sup>                   | 209.0120 | 4.44 ± 6.52 | 3.00 ± 3.69 | 2.52 ± 3.24 | 1.90 ± 1.80 |

106 <sup>a</sup>Aliphatic and aromatic OSs were grouped into anthropogenic OSs (OS<sub>a</sub>) (Riva et al. 2016b; Riva et al.  
107 2015). Several unidentified aromatic and aliphatic OSs were classified as other anthropogenic OSs (OS<sub>a</sub>-  
108 other).  
109

**Table S4.** The mean mass concentrations of various OSs in PM<sub>2.5</sub> at different locations.

| Typical Environment | Sampling site            | Period | Season | OS <sub>i</sub><br>(ng m <sup>-3</sup> ) | OS <sub>m</sub><br>(ng m <sup>-3</sup> ) | OS <sub>a</sub><br>(ng m <sup>-3</sup> ) | C <sub>2</sub> -C <sub>3</sub><br>(ng m <sup>-3</sup> ) | Total<br>(ng m <sup>-3</sup> ) | Ref.                        |
|---------------------|--------------------------|--------|--------|------------------------------------------|------------------------------------------|------------------------------------------|---------------------------------------------------------|--------------------------------|-----------------------------|
| Urban               | Pearl River Delta, China | 2012   | Summer | 0.68                                     | -                                        | -                                        | -                                                       | 0.68                           | (He et al. 2014)            |
|                     |                          |        | Spring | 0.017                                    | 0.20                                     | 0.219                                    | -                                                       | 0.44                           |                             |
|                     | Shanghai, China          | 2012   | Summer | 23.1                                     | 26.7                                     | 0.77                                     | -                                                       | 50.57                          | (Ma et al. 2014)            |
|                     |                          |        | Autumn | 0.063                                    | 0.77                                     | 0.79                                     | -                                                       | 1.62                           |                             |
|                     |                          |        | Winter | 0.82                                     | 0.90                                     | 0.72                                     | -                                                       | 2.44                           |                             |
|                     | Beijing, China           | 2016   | Spring | 16.2                                     | 13.0                                     | -                                        | 19.5                                                    | 48.7                           | (Wang et al. 2018)          |
|                     | Beijing, China           | 2016   | Summer | 12.3                                     | 15.1                                     | -                                        | -                                                       | 27.4                           | (Wang et al. 2020)          |
|                     |                          |        | Winter | 2.0                                      | 6.0                                      | -                                        | -                                                       | 8.0                            |                             |
|                     | Atlanta, GA, USA         | 2014   | Summer | 1122.98                                  | 67.9                                     | -                                        | 58.5                                                    | 1249.38                        | (Hettiyadura et al. 2019)   |
|                     | Guangzhou, China         | 2019   | Summer | 181.8                                    | 10.8                                     | -                                        | -                                                       | 192.6                          | (Bryant et al. 2021)        |
|                     |                          |        | Winter | 600                                      | -                                        | -                                        | -                                                       | 600                            |                             |
|                     | Tianjing, China          | 2019   | Summer | 400                                      | -                                        | -                                        | -                                                       | 400                            | (Ding et al. 2022)          |
|                     |                          |        | Winter | 31.5                                     | 20.7                                     | 3.1                                      | -                                                       | 55.3                           |                             |
|                     | Patra, Greece            | 2018   | Spring | 75.7                                     | 32.4                                     | 1.3                                      | -                                                       | 109.4                          | (Kanellopoulos et al. 2022) |
|                     |                          |        | Summer | 658                                      | 37.7                                     | 1.6                                      | -                                                       | 697.3                          |                             |
|                     |                          |        | Autumn | 53.2                                     | 25.4                                     | 1.1                                      | -                                                       | 79.7                           |                             |
|                     | Hong Kong, China         | 2016   | Summer | 163.19                                   | 2.95                                     | -                                        | -                                                       | 166.14                         |                             |
|                     |                          | 2017   | Winter | 97.96                                    | 17.26                                    | -                                        | -                                                       | 115.22                         |                             |
|                     | Guangzhou, China         | 2016   | Summer | 460.2                                    | 26.22                                    | -                                        | -                                                       | 486.42                         |                             |
|                     |                          | 2017   | Winter | 88.03                                    | 20.96                                    | -                                        | -                                                       | 108.99                         |                             |
| Beijing, China      | 2016                     | Summer | 236.64 | 21.7                                     | -                                        | -                                        | 258.34                                                  | (Wang et al. 2022)             |                             |
|                     | 2017                     | Winter | 176.32 | 36.01                                    | -                                        | -                                        | 212.33                                                  |                                |                             |
| Shanghai, China     | 2016                     | Summer | 326.4  | 34.9                                     | -                                        | -                                        | 361.3                                                   |                                |                             |
|                     | 2017                     | Winter | 70.31  | 32.32                                    | -                                        | -                                        | 102.63                                                  |                                |                             |

|             |                      |      |        |       |       |       |       |        |                           |
|-------------|----------------------|------|--------|-------|-------|-------|-------|--------|---------------------------|
|             | Copenhagen, Denmark  | 2011 | Summer | 11.31 | 0.87  | -     | -     | 18.18  | (Nguyen et al. 2014)      |
|             | Xi'an, China         | 2014 | Winter | -     | -     | 0.14  | 77.3  | 77.44  | (Huang et al. 2018)       |
| Suburban    | Centreville, AL, USA | 2013 | Summer | 15.40 | -     | 1.16  | 20.6  | 37.16  | (Hettiyadura et al. 2017) |
|             | Zion, Illinois, USA  | 2013 | Spring | 121.1 | 8.7   | -     | -     | 129.8  | (Hughes et al. 2021)      |
| Regional    | Beijing, China       | 2016 | Summer | 5.9   | 16.1  | -     | -     | 22.0   |                           |
|             |                      |      | Winter | 69.5  | 18.7  | -     | -     | 88.2   | (Wang et al. 2020)        |
| Forest      | Centreville, Alabama | 2013 | Summer | 16.5  | 20.6  | -     | -     | 37.1   | (Hettiyadura et al. 2017) |
| Polar sites | Arctic sites         |      | Spring | 47    | -     | -     | -     | 47     | (Hansen et al. 2014)      |
| Urban       | Shanghai, China      | 2021 | Summer | 85.38 | 30.61 | 19.31 | 23.38 | 158.68 |                           |
| Suburban    |                      |      |        | 48.98 | 19.30 | 15.73 | 18.25 | 102.26 | In this study             |

111 <sup>a</sup>The symbol of “-” denotes no data.

112

113

114

115

116 **Table S5.** The mean values ( $\pm$  SD) of the major parameters observed in different periods in daytime and nighttime.

|                                                                                    | Urban- period A     |                     | Urban- period B     |                      | Suburban-period A   |                     | Suburban-period B   |                      |
|------------------------------------------------------------------------------------|---------------------|---------------------|---------------------|----------------------|---------------------|---------------------|---------------------|----------------------|
|                                                                                    | Daytime             | Nighttime           | Daytime             | Nighttime            | Daytime             | Nighttime           | Daytime             | Nighttime            |
| T (°C)                                                                             | 33.64 $\pm$ 0.98    | 29.16 $\pm$ 0.25    | 30.93 $\pm$ 0.78    | 27.95 $\pm$ 0.62     | 33.64 $\pm$ 0.98    | 29.16 $\pm$ 0.25    | 30.93 $\pm$ 0.78    | 27.95 $\pm$ 0.62     |
| RH (%)                                                                             | 73.45 $\pm$ 3.57    | 89.84 $\pm$ 1.83    | 75.88 $\pm$ 3.84    | 90.59 $\pm$ 1.85     | 73.45 $\pm$ 3.57    | 89.84 $\pm$ 1.83    | 75.88 $\pm$ 3.84    | 90.59 $\pm$ 1.85     |
| Wind speed                                                                         | 2.08 $\pm$ 0.66     | 1.97 $\pm$ 0.46     | 2.61 $\pm$ 0.19     | 2.17 $\pm$ 0.42      | 2.08 $\pm$ 0.66     | 1.97 $\pm$ 0.46     | 2.61 $\pm$ 0.19     | 2.17 $\pm$ 0.42      |
| PBLH (m)                                                                           | 459.17 $\pm$ 59.02  | 333.61 $\pm$ 36.65  | 919.17 $\pm$ 189.63 | 574.63 $\pm$ 83.41   | 459.17 $\pm$ 59.02  | 333.61 $\pm$ 36.65  | 919.17 $\pm$ 189.63 | 574.63 $\pm$ 83.41   |
| UV (w/m <sup>2</sup> )                                                             | 21.87 $\pm$ 3.97    | 0.38 $\pm$ 0.01     | 21.17 $\pm$ 3.13    | 0.37 $\pm$ 0.01      | 21.87 $\pm$ 3.97    | 0.38 $\pm$ 0.01     | 21.17 $\pm$ 3.13    | 0.37 $\pm$ 0.01      |
| VC                                                                                 | 951.89 $\pm$ 294.19 | 668.68 $\pm$ 220.05 | 2377.4 $\pm$ 378.6  | 1258.67 $\pm$ 334.63 | 951.89 $\pm$ 294.19 | 668.68 $\pm$ 220.05 | 2377.4 $\pm$ 378.6  | 1258.67 $\pm$ 334.63 |
| NO <sub>2</sub> (ppb)                                                              | 8.13 $\pm$ 1.80     | 9.25 $\pm$ 1.65     | 3.76 $\pm$ 1.31     | 5.01 $\pm$ 1.31      | 9.14 $\pm$ 1.26     | 9.76 $\pm$ 2.99     | 3.82 $\pm$ 1.75     | 5.80 $\pm$ 2.28      |
| NO (ppb)                                                                           | 0.47 $\pm$ 0.56     | 1.91 $\pm$ 0.38     | 0.70 $\pm$ 0.51     | 1.25 $\pm$ 1.02      | 2.13 $\pm$ 0.55     | 1.93 $\pm$ 0.29     | 1.98 $\pm$ 0.31     | 2.37 $\pm$ 0.53      |
| O <sub>3</sub> (ppb)                                                               | 70.28 $\pm$ 8.44    | 28.98 $\pm$ 8.70    | 31.79 $\pm$ 9.08    | 15.55 $\pm$ 7.48     | 59.73 $\pm$ 11.47   | 24.69 $\pm$ 7.79    | 29.43 $\pm$ 8.07    | 16.21 $\pm$ 8.68     |
| SO <sub>2</sub> (ppb)                                                              | 3.08 $\pm$ 0.71     | 2.20 $\pm$ 0.36     | 1.65 $\pm$ 0.50     | 1.68 $\pm$ 0.72      | 2.37 $\pm$ 0.09     | 2.21 $\pm$ 0.08     | 2.21 $\pm$ 0.11     | 2.19 $\pm$ 0.13      |
| ALW (ug m <sup>-3</sup> )                                                          | 3.26 $\pm$ 1.64     | 5.14 $\pm$ 3.53     | 1.40 $\pm$ 0.80     | 2.57 $\pm$ 2.20      | 1.29 $\pm$ 1.15     | 2.15 $\pm$ 1.24     | 1.70 $\pm$ 1.26     | 2.55 $\pm$ 2.86      |
| pH                                                                                 | 2.08 $\pm$ 0.48     | 2.14 $\pm$ 0.31     | 3.10 $\pm$ 1.06     | 2.68 $\pm$ 0.98      | 2.21 $\pm$ 0.62     | 2.13 $\pm$ 0.35     | 2.56 $\pm$ 1.09     | 1.99 $\pm$ 0.43      |
| OM (ug m <sup>-3</sup> )                                                           | 23.39 $\pm$ 4.64    | 15.38 $\pm$ 4.26    | 7.02 $\pm$ 2.78     | 3.91 $\pm$ 1.25      | 12.23 $\pm$ 3.51    | 8.72 $\pm$ 4.24     | 4.18 $\pm$ 2.59     | 2.55 $\pm$ 1.11      |
| EC (ug m <sup>-3</sup> )                                                           | 4.34 $\pm$ 1.24     | 3.71 $\pm$ 1.05     | 1.05 $\pm$ 0.94     | 0.38 $\pm$ 0.29      | 2.16 $\pm$ 0.92     | 1.51 $\pm$ 0.92     | 0.49 $\pm$ 0.86     | 0.21 $\pm$ 0.22      |
| NO <sub>3</sub> <sup>-</sup> (ug m <sup>-3</sup> )                                 | 2.60 $\pm$ 0.71     | 3.09 $\pm$ 2.18     | 1.44 $\pm$ 0.25     | 0.92 $\pm$ 0.14      | 2.28 $\pm$ 0.59     | 2.29 $\pm$ 2.12     | 1.11 $\pm$ 0.20     | 1.09 $\pm$ 1.02      |
| SO <sub>4</sub> <sup>2-</sup> (ug m <sup>-3</sup> )                                | 5.29 $\pm$ 1.65     | 4.10 $\pm$ 1.22     | 2.41 $\pm$ 1.18     | 2.00 $\pm$ 1.28      | 3.08 $\pm$ 1.02     | 2.23 $\pm$ 0.52     | 2.29 $\pm$ 1.21     | 2.13 $\pm$ 1.82      |
| PM <sub>2.5</sub> (ug m <sup>-3</sup> )                                            | 31.75 $\pm$ 8.68    | 25.67 $\pm$ 9.12    | 12.54 $\pm$ 2.22    | 10.80 $\pm$ 3.10     | 27.91 $\pm$ 10.49   | 20.82 $\pm$ 8.25    | 10.75 $\pm$ 2.08    | 10.46 $\pm$ 3.95     |
| Total OSs (ng m <sup>-3</sup> )                                                    | 498.72 $\pm$ 249.22 | 272.38 $\pm$ 147.84 | 67.13 $\pm$ 24.53   | 48.55 $\pm$ 17.15    | 241.83 $\pm$ 123.49 | 175.04 $\pm$ 96.13  | 64.65 $\pm$ 18.61   | 49.4 $\pm$ 18.08     |
| OS <sub>i</sub> (ng m <sup>-3</sup> )                                              | 289.18 $\pm$ 145.14 | 146.30 $\pm$ 103.80 | 32.04 $\pm$ 16.37   | 19.43 $\pm$ 11.77    | 132.56 $\pm$ 75.86  | 75.98 $\pm$ 42.35   | 29.21 $\pm$ 13.08   | 20.41 $\pm$ 12.23    |
| C <sub>3</sub> H <sub>11</sub> O <sub>7</sub> S <sup>-</sup> (ng m <sup>-3</sup> ) | 136.47 $\pm$ 71.59  | 66.77 $\pm$ 55.60   | 11.93 $\pm$ 8.75    | 8.07 $\pm$ 7.06      | 54.26 $\pm$ 36.67   | 30.08 $\pm$ 19.65   | 11.33 $\pm$ 6.48    | 8.52 $\pm$ 6.89      |
| NOS <sub>i</sub> (ng m <sup>-3</sup> )                                             | 13.33 $\pm$ 11.18   | 19.24 $\pm$ 13.08   | 0.81 $\pm$ 0.25     | 0.62 $\pm$ 0.30      | 4.19 $\pm$ 2.53     | 5.58 $\pm$ 3.81     | 0.8 $\pm$ 0.28      | 0.62 $\pm$ 0.35      |
| OS <sub>m</sub> (ng m <sup>-3</sup> )                                              | 105.86 $\pm$ 70.67  | 55.97 $\pm$ 26.08   | 8.09 $\pm$ 3.16     | 8.73 $\pm$ 3.96      | 42.14 $\pm$ 27.33   | 51.62 $\pm$ 52.67   | 8.88 $\pm$ 1.88     | 7.64 $\pm$ 2.34      |
| C <sub>8</sub> H <sub>13</sub> O <sub>7</sub> S <sup>-</sup> (ng m <sup>-3</sup> ) | 27.70 $\pm$ 21.05   | 9.95 $\pm$ 6.43     | 1.64 $\pm$ 0.75     | 0.93 $\pm$ 0.27      | 10.29 $\pm$ 7.28    | 32.00 $\pm$ 49.38   | 1.39 $\pm$ 0.40     | 0.95 $\pm$ 0.34      |
| NOS <sub>m</sub> (ng m <sup>-3</sup> )                                             | 1.57 $\pm$ 0.58     | 6.63 $\pm$ 0.48     | 0.46 $\pm$ 0.26     | 1.66 $\pm$ 1.18      | 1.12 $\pm$ 0.20     | 2.44 $\pm$ 0.29     | 0.49 $\pm$ 0.24     | 1.21 $\pm$ 0.55      |
| C <sub>2</sub> -C <sub>3</sub> OS (ng m <sup>-3</sup> )                            | 63.51 $\pm$ 19.82   | 41.10 $\pm$ 11.74   | 12.55 $\pm$ 4.68    | 9.27 $\pm$ 3.57      | 41.73 $\pm$ 13.50   | 27.81 $\pm$ 8.65    | 12.38 $\pm$ 4.39    | 9.85 $\pm$ 4.15      |
| OS <sub>a</sub> (ng m <sup>-3</sup> )                                              | 40.17 $\pm$ 16.25   | 29.01 $\pm$ 6.92    | 14.45 $\pm$ 1.64    | 11.12 $\pm$ 1.91     | 25.40 $\pm$ 8.12    | 19.63 $\pm$ 3.45    | 14.18 $\pm$ 1.06    | 11.5 $\pm$ 0.90      |

117

118

119

120

121

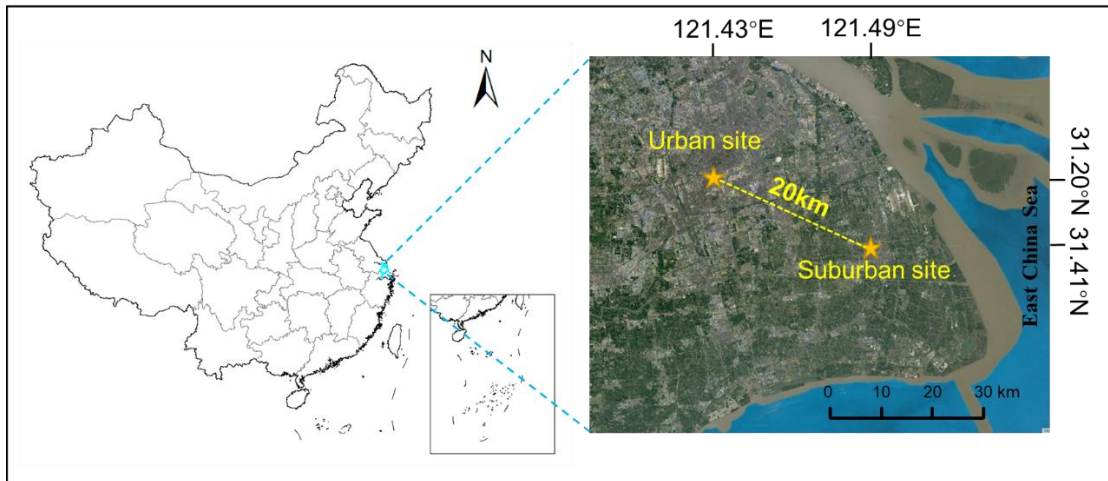

122

123 **Figure S1.** The locations of the sampling sites. The map was derived from Baidu Maps

124 (BIDU, China).

125

126

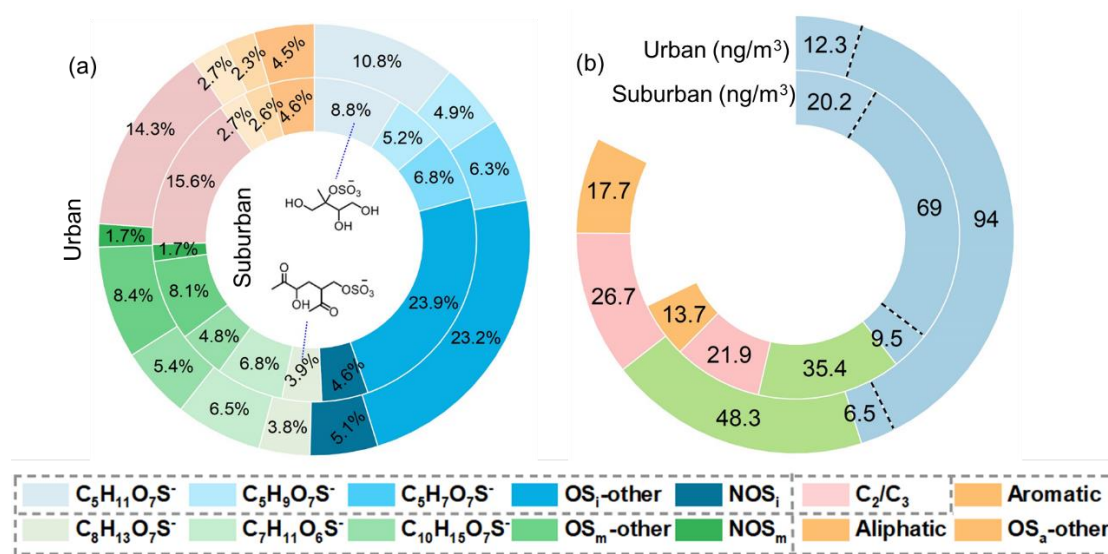

128

129 **Figure S2.** Average distributions in (a) mass concentrations and (b) mass fractions of130 various OSs in PM<sub>2.5</sub> collected in urban and suburban Shanghai in September 2020.

131



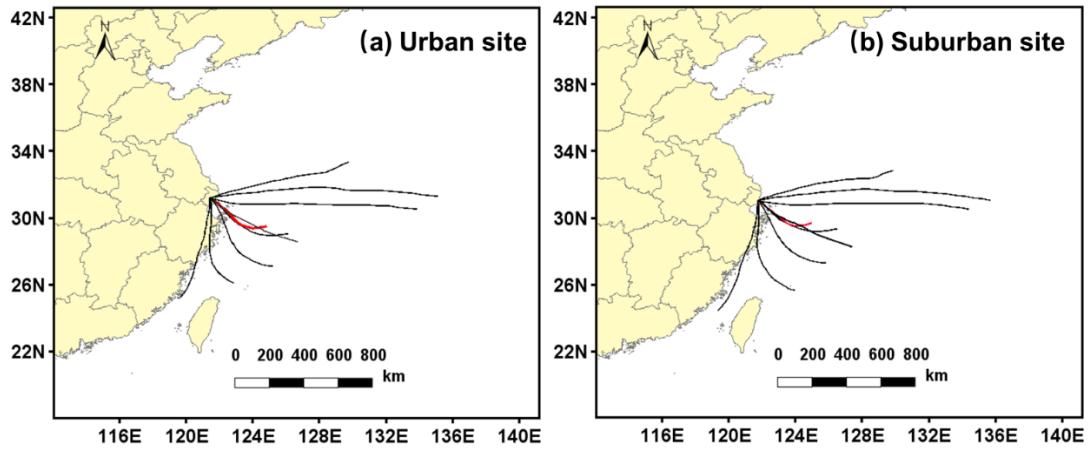

132

133 **Figure S3.** The 1-day (24 h) backward trajectories showing the daily air mass flows to  
 134 the (a) urban and (b) suburban sites during period B.

135

136

137

138

139

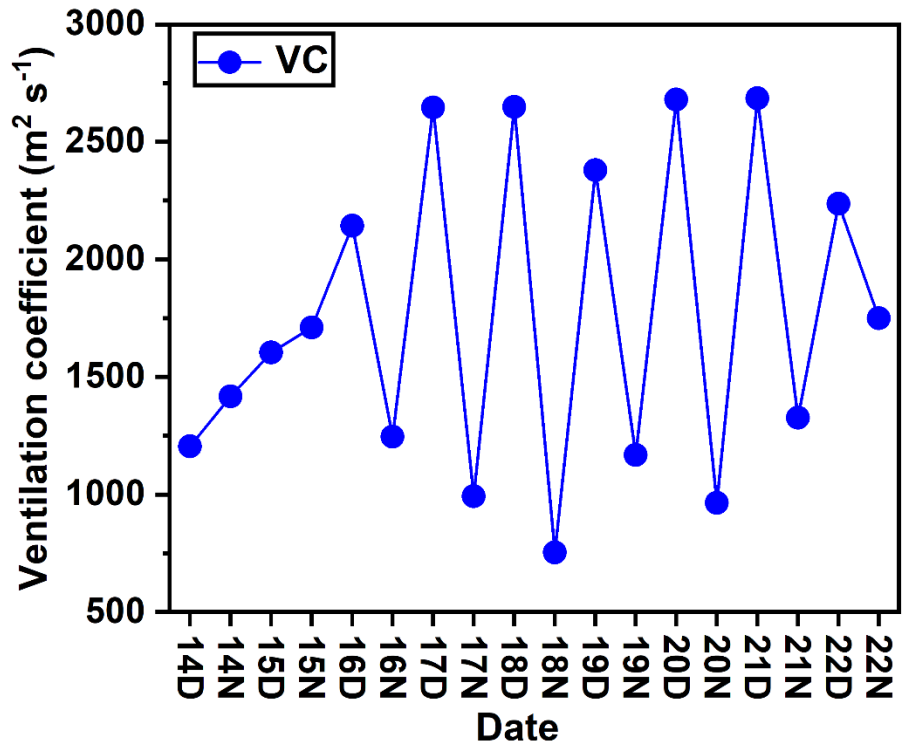

140

141 **Figure S4.** The temporal variations of ventilation coefficient (VC) during the sampling

142 period.

143

144

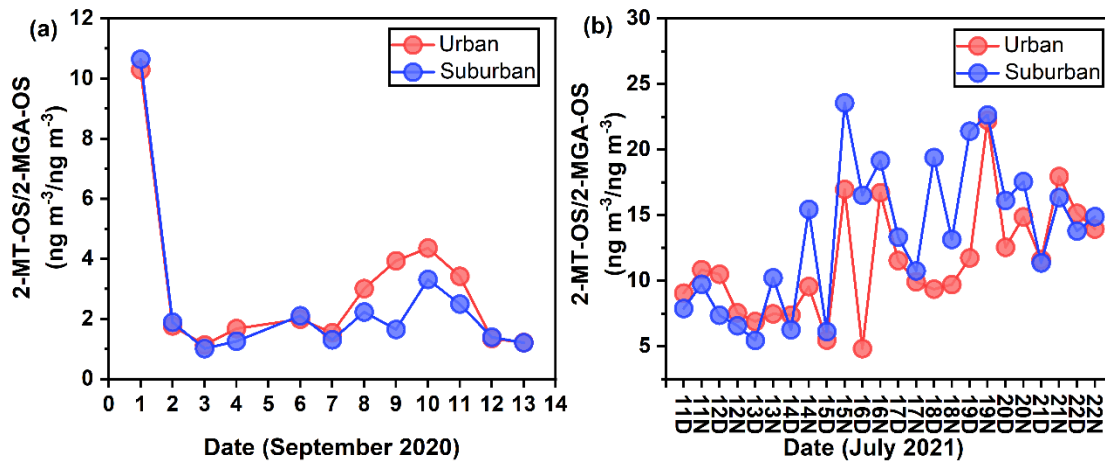

145

146 **Figure S5.** The temporal variations of the ratio of 2-MT-OS to 2-MGA-OS during (a)

147 2020 and (b) 2021 sampling campaigns.

148

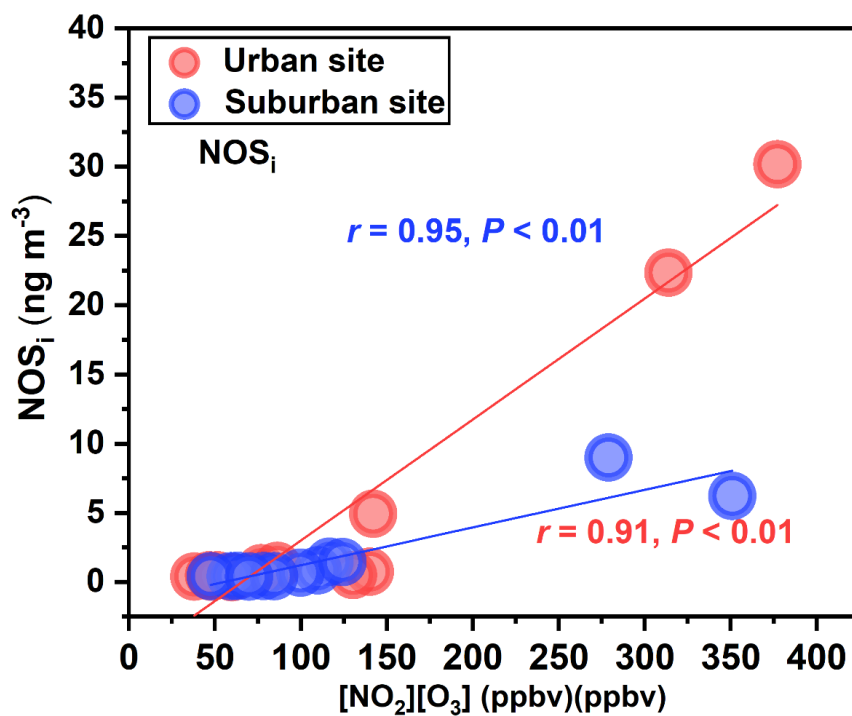

149

150 **Figure S6.** Scatterplots of the products of NO<sub>2</sub> and O<sub>3</sub> concentrations with the mass  
 151 concentrations of NOS<sub>i</sub> in PM<sub>2.5</sub> collected in the urban and suburban areas. Red and  
 152 blue lines show regression lines at the urban and suburban sites, respectively.

153

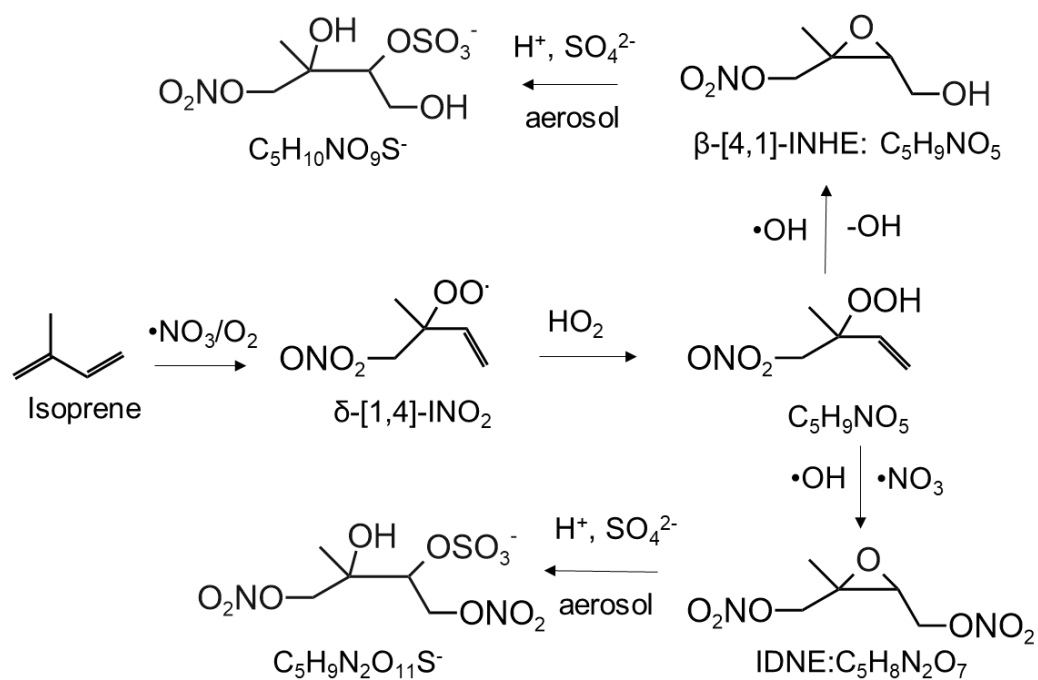

154

155 **Figure S7.** Possible formation mechanisms of  $\text{C}_5\text{H}_{10}\text{NO}_9\text{S}^-$  and  $\text{C}_5\text{H}_9\text{N}_2\text{O}_{11}\text{S}^-$ .

156

157

158

159

160

161

162

163

164

165

166

167

168

169

170

171

172

173

174

175

176

177

178

179

180

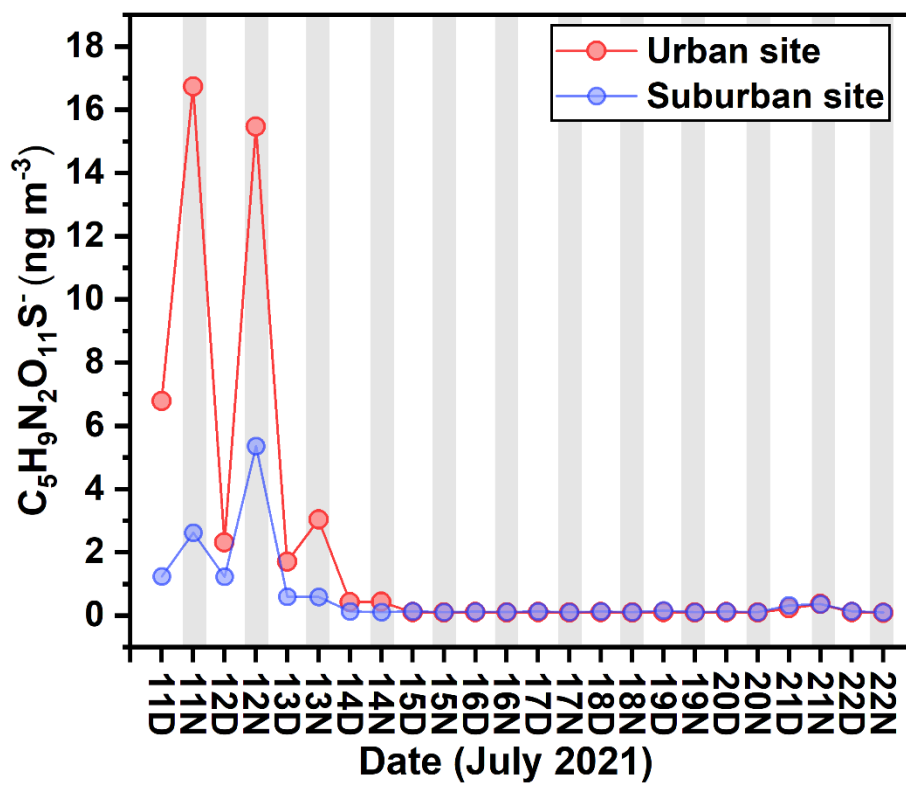

181

182 **Figure S8.** Temporal variations in the concentrations of  $C_5H_9N_2O_{11}S^-$ .

183

184

185

186

187

188

189 **REFERENCES**

- 190 Berndt, T., Mentler, B., Scholz, W., Fischer, L., Herrmann, H., Kulmala, M., and Hansel,  
191 A.: Accretion Product Formation from Ozonolysis and OH Radical Reaction of  
192 alpha-Pinene: Mechanistic Insight and the Influence of Isoprene and Ethylene,  
193 Environ. Sci. Technol., 52, 11069-11077, 10.1021/acs.est.8b02210, 2018.
- 194 Berndt, T., Richters, S., Jokinen, T., Hyttinen, N., Kurten, T., Otkjaer, R. V., Kjaergaard,  
195 H. G., Stratmann, F., Herrmann, H., Sipila, M., Kulmala, M., and Ehn, M.:  
196 Hydroxyl radical-induced formation of highly oxidized organic compounds, Nat.  
197 Commun., 7, 13677, 10.1038/ncomms13677, 2016.
- 198 Boyd, C. M., Sanchez, J., Xu, L., Eugene, A. J., Nah, T., Tuet, W. Y., Guzman, M. I.,  
199 and Ng, N. L.: Secondary organic aerosol formation from the  $\beta$ -  
200 pinene+NO<sub>3</sub> system: effect of humidity and peroxy  
201 radical fate, Atmos. Chem. Phys., 15, 7497-7522, 10.5194/acp-15-7497-2015,  
202 2015.
- 203 Bryant, D. J., Elzein, A., Newland, M., White, E., Swift, S., Watkins, A., Deng, W.,  
204 Song, W., Wang, S., Zhang, Y., Wang, X., Rickard, A. R., and Hamilton, J. F.:  
205 Importance of Oxidants and Temperature in the Formation of Biogenic  
206 Organosulfates and Nitrooxy Organosulfates, ACS Earth Space Chem., 5, 2291-  
207 2306, 10.1021/acsearthspacechem.1c00204, 2021.
- 208 Ding, S., Chen, Y., Devineni, S. R., Pavuluri, C. M., and Li, X. D.: Distribution  
209 characteristics of organosulfates (OSs) in PM<sub>2.5</sub> in Tianjin, Northern China:  
210 Quantitative analysis of total and three OS species, Sci. Total. Environ., 834,

211 155314, 10.1016/j.scitotenv.2022.155314, 2022.

212 Ehn, M., Kleist, E., Junninen, H., Petäjä, T., Lönn, G., Schobesberger, S., Dal Maso,  
213 M., Trimborn, A., Kulmala, M., Worsnop, D. R., Wahner, A., Wildt, J., and Mentel,  
214 T. F.: Gas phase formation of extremely oxidized pinene reaction products in  
215 chamber and ambient air, *Atmos. Chem. Phys.*, 12, 5113-5127, 10.5194/acp-12-  
216 5113-2012, 2012.

217 Ehn, M., Thornton, J. A., Kleist, E., Sipila, M., Junninen, H., Pullinen, I., Springer, M.,  
218 Rubach, F., Tillmann, R., Lee, B., Lopez-Hilfiker, F., Andres, S., Acir, I. H.,  
219 Rissanen, M., Jokinen, T., Schobesberger, S., Kangasluoma, J., Kontkanen, J.,  
220 Nieminen, T., Kurten, T., Nielsen, L. B., Jorgensen, S., Kjaergaard, H. G.,  
221 Canagaratna, M., Maso, M. D., Berndt, T., Petaja, T., Wahner, A., Kerminen, V.  
222 M., Kulmala, M., Worsnop, D. R., Wildt, J., and Mentel, T. F.: A large source of  
223 low-volatility secondary organic aerosol, *Nature*, 506, 476-479,  
224 10.1038/nature13032, 2014.

225 Guo, Y., Yan, C., Liu, Y., Qiao, X., Zheng, F., Zhang, Y., Zhou, Y., Li, C., Fan, X., Lin,  
226 Z., Feng, Z., Zhang, Y., Zheng, P., Tian, L., Nie, W., Wang, Z., Huang, D.,  
227 Daellenbach, K. R., Yao, L., Dada, L., Bianchi, F., Jiang, J., Liu, Y., Kerminen, V.-  
228 M., and Kulmala, M.: Seasonal variation in oxygenated organic molecules in urban  
229 Beijing and their contribution to secondary organic aerosol, *Atmos. Chem. Phys.*,  
230 22, 10077-10097, 10.5194/acp-22-10077-2022, 2022.

231 Hansen, A. M. K., Kristensen, K., Nguyen, Q. T., Zare, A., Cozzi, F., Nøjgaard, J. K.,  
232 Skov, H., Brandt, J., Christensen, J. H., Ström, J., Tunved, P., Krejci, R., and



233 Glasius, M.: Organosulfates and organic acids in Arctic aerosols: speciation,  
234 annual variation and concentration levels, *Atmos. Chem. Phys.*, 14, 7807-7823,  
235 10.5194/acp-14-7807-2014, 2014.

236 He, Q. F., Ding, X., Wang, X. M., Yu, J. Z., Fu, X. X., Liu, T. Y., Zhang, Z., Xue, J.,  
237 Chen, D. H., Zhong, L. J., and Donahue, N. M.: Organosulfates from pinene and  
238 isoprene over the Pearl River Delta, South China: seasonal variation and  
239 implication in formation mechanisms, *Environ Sci Technol*, 48, 9236-9245,  
240 10.1021/es501299v, 2014.

241 Hettiyadura, A. P. S., Al-Naiema, I. M., Hughes, D. D., Fang, T., and Stone, E. A.:  
242 Organosulfates in Atlanta, Georgia: anthropogenic influences on biogenic  
243 secondary organic aerosol formation, *Atmos. Chem. Phys.*, 19, 3191-3206,  
244 10.5194/acp-19-3191-2019, 2019.

245 Hettiyadura, A. P. S., Stone, E. A., Kundu, S., Baker, Z., Geddes, E., Richards, K., and  
246 Humphry, T.: Determination of atmospheric organosulfates using HILIC  
247 chromatography with MS detection, *Atoms. Meas. Tech.*, 8, 2347-2358,  
248 10.5194/amt-8-2347-2015, 2015.

249 Hettiyadura, A. P. S., Jayarathne, T., Baumann, K., Goldstein, A. H., de Gouw, J. A.,  
250 Koss, A., Keutsch, F. N., Skog, K., and Stone, E. A.: Qualitative and quantitative  
251 analysis of atmospheric organosulfates in Centreville, Alabama, *Atmos. Chem.*  
252 *Phys.*, 17, 1343-1359, 10.5194/acp-17-1343-2017, 2017.

253 Huang, R.-J., Cao, J., Chen, Y., Yang, L., Shen, J., You, Q., Wang, K., Lin, C., Xu, W.,  
254 Gao, B., Li, Y., Chen, Q., Hoffmann, T., O'Dowd, C. D., Bilde, M., and Glasius,

255 M.: Organosulfates in atmospheric aerosol: synthesis and quantitative analysis of  
256 PM<sub>2.5</sub> from Xi'an, northwestern China, *Atmos. Meas. Tech.*, 11, 3447-3456,  
257 10.5194/amt-11-3447-2018, 2018.

258 Hughes, D. D., Christiansen, M. B., Milani, A., Vermeuel, M. P., Novak, G. A., Alwe,  
259 H. D., Dickens, A. F., Pierce, R. B., Millet, D. B., Bertram, T. H., Stanier, C. O.,  
260 and Stone, E. A.: PM<sub>2.5</sub> chemistry, organosulfates, and secondary organic aerosol  
261 during the 2017 Lake Michigan Ozone Study, *Atmos. Environ.*, 244,  
262 10.1016/j.atmosenv.2020.117939, 2021.

263 Jiang, H., Li, J., Tang, J., Cui, M., Zhao, S., Mo, Y., Tian, C., Zhang, X., Jiang, B., Liao,  
264 Y., Chen, Y., and Zhang, G.: Molecular characteristics, sources, and formation  
265 pathways of organosulfur compounds in ambient aerosol in Guangzhou, South  
266 China, *Atmos. Chem. Phys.*, 22, 6919-6935, 10.5194/acp-22-6919-2022, 2022.

267 Jokinen, T., Sipila, M., Richters, S., Kerminen, V. M., Paasonen, P., Stratmann, F.,  
268 Worsnop, D., Kulmala, M., Ehn, M., Herrmann, H., and Berndt, T.: Rapid  
269 autoxidation forms highly oxidized RO<sub>2</sub> radicals in the atmosphere, *Angew. Chem.*  
270 *Int. Ed. Engl.*, 53, 14596-14600, 10.1002/anie.201408566, 2014.

271 Kanellopoulos, P. G., Kotsaki, S. P., Chrysochou, E., Koukoulakis, K., Zacharopoulos,  
272 N., Philippopoulos, A., and Bakeas, E.: PM<sub>2.5</sub>-bound organosulfates in two  
273 Eastern Mediterranean cities: The dominance of isoprene organosulfates,  
274 *Chemosphere*, 297, 134103, 10.1016/j.chemosphere.2022.134103, 2022.

275 Ma, J., Ungeheuer, F., Zheng, F., Du, W., Wang, Y., Cai, J., Zhou, Y., Yan, C., Liu, Y.,  
276 Kulmala, M., Daellenbach, K. R., and Vogel, A. L.: Nontarget Screening Exhibits

277 a Seasonal Cycle of PM<sub>2.5</sub> Organic Aerosol Composition in Beijing, *Environ. Sci.*  
278 *Technol.*, 56, 7017-7028, 10.1021/acs.est.1c06905, 2022.

279 Ma, Y., Xu, X., Song, W., Geng, F., and Wang, L.: Seasonal and diurnal variations of  
280 particulate organosulfates in urban Shanghai, China, *Atmos. Environ.*, 85, 152-  
281 160, 10.1016/j.atmosenv.2013.12.017, 2014.

282 Nestorowicz, K., Jaoui, M., Rudzinski, K. J., Lewandowski, M., Kleindienst, T. E.,  
283 Spolnik, G., Danikiewicz, W., and Szmigielski, R.: Chemical composition of  
284 isoprene SOA under acidic and non-acidic conditions: effect of relative humidity,  
285 *Atmos Chem Phys*, 18, 18101-18121, 10.5194/acp-18-18101-2018, 2018.

286 Nguyen, Q. T., Christensen, M. K., Cozzi, F., Zare, A., Hansen, A. M. K., Kristensen,  
287 K., Tulinius, T. E., Madsen, H. H., Christensen, J. H., Brandt, J., Massling, A.,  
288 Nøjgaard, J. K., and Glasius, M.: Understanding the anthropogenic influence on  
289 formation of biogenic secondary organic aerosols in Denmark via analysis of  
290 organosulfates and related oxidation products, *Atmos. Chem. Phys.*, 14, 8961-  
291 8981, 10.5194/acp-14-8961-2014, 2014.

292 Nozière, B., Ekström, S., Alsberg, T., and Holmström, S.: Radical-initiated formation  
293 of organosulfates and surfactants in atmospheric aerosols, *Geophys. Res. Lett.*, 37,  
294 n/a-n/a, 10.1029/2009gl041683, 2010.

295 Olson, C. N., Galloway, M. M., Yu, G., Hedman, C. J., Lockett, M. R., Yoon, T., Stone,  
296 E. A., Smith, L. M., and Keutsch, F. N.: Hydroxycarboxylic acid-derived  
297 organosulfates: synthesis, stability, and quantification in ambient aerosol, *Environ*  
298 *Sci Technol*, 45, 6468-6474, 10.1021/es201039p, 2011.

299 Riva, M., Budisulistiorini, S. H., Zhang, Z., Gold, A., and Surratt, J. D.: Chemical  
300 characterization of secondary organic aerosol constituents from isoprene  
301 ozonolysis in the presence of acidic aerosol, *Atmospheric Environment*, 130, 5-13,  
302 10.1016/j.atmosenv.2015.06.027, 2016a.

303 Riva, M., Da Silva Barbosa, T., Lin, Y. H., Stone, E. A., Gold, A., and Surratt, J. D.:  
304 Chemical characterization of organosulfates in secondary organic aerosol derived  
305 from the photooxidation of alkanes, *Atmos. Chem. Phys.*, 16, 11001-11018,  
306 10.5194/acp-16-11001-2016, 2016b.

307 Riva, M., Tomaz, S., Cui, T., Lin, Y. H., Perraudin, E., Gold, A., Stone, E. A., Villenave,  
308 E., and Surratt, J. D.: Evidence for an unrecognized secondary anthropogenic  
309 source of organosulfates and sulfonates: gas-phase oxidation of polycyclic  
310 aromatic hydrocarbons in the presence of sulfate aerosol, *Environ. Sci. Technol.*,  
311 49, 6654-6664, 10.1021/acs.est.5b00836, 2015.

312 Schindelka, J., Iinuma, Y., Hoffmann, D., and Herrmann, H.: Sulfate radical-initiated  
313 formation of isoprene-derived organosulfates in atmospheric aerosols, *Faraday*  
314 *Discuss.*, 165, 237-259, 10.1039/c3fd00042g, 2013.

315 Shalamzari, M. S., Ryabtsova, O., Kahnt, A., Vermeylen, R., Herent, M. F., Quetin-  
316 Leclercq, J., Van der Veken, P., Maenhaut, W., and Claeys, M.: Mass spectrometric  
317 characterization of organosulfates related to secondary organic aerosol from  
318 isoprene, *Rapid Commun. Mass Spectrom.*, 784-794, 10.1002/rcm.6511, 2013,  
319 2013.

320 Surratt, J. D., Lewandowski, M., Offenberg, J. H., Jaoui, M., Kleindienst, T.E., Edney,

321 E. O., and Seinfeld, J. H.: Effect of Acidity on Secondary Organic Aerosol  
322 Formation from Isoprene, *Environ. Sci. Technol.*, 41, 5363–5369, 2007.

323 Surratt, J. D., Chan, A. W., Eddingsaas, N. C., Chan, M., Loza, C. L., Kwan, A. J.,  
324 Hersey, S. P., Flagan, R. C., Wennberg, P. O., and Seinfeld, J. H.: Reactive  
325 intermediates revealed in secondary organic aerosol formation from isoprene, *Proc.*  
326 *Natl. Acad. Sci. U.S.A.*, 107, 6640-6645, 10.1073/pnas.0911114107, 2010.

327 Surratt, J. D., Gómez-González, Y., Chan, A. W. H., Vermeylen, R., Shahgholi, M.,  
328 Kleindienst, T. E., Edney, E. O., Offenberg, J. H., Lewandowski, M., Jaoui, M.,  
329 Maenhaut, W., Claeys, M., Flagan, R. C., and Seinfeld, J. H.: Organosulfate  
330 Formation in Biogenic Secondary Organic Aerosol, *J. Phys. Chem. A.*, 112, 8345-  
331 8378, 10.1021/jp802310p, 2008.

332 Tao, S., Lu, X., Levac, N., Bateman, A. P., Nguyen, T. B., Bones, D. L., Nizkorodov, S.  
333 A., Laskin, J., Laskin, A., and Yang, X.: Molecular characterization of  
334 organosulfates in organic aerosols from Shanghai and Los Angeles urban areas by  
335 nanospray-desorption electrospray ionization high-resolution mass spectrometry,  
336 *Environ. Sci. Technol.*, 48, 10993-11001, 10.1021/es5024674, 2014.

337 Trostl, J., Chuang, W. K., Gordon, H., Heinritzi, M., Yan, C., Molteni, U., Ahlm, L.,  
338 Frege, C., Bianchi, F., Wagner, R., Simon, M., Lehtipalo, K., Williamson, C.,  
339 Craven, J. S., Duplissy, J., Adamov, A., Almeida, J., Bernhammer, A. K.,  
340 Breitenlechner, M., Brilke, S., Dias, A., Ehrhart, S., Flagan, R. C., Franchin, A.,  
341 Fuchs, C., Guida, R., Gysel, M., Hansel, A., Hoyle, C. R., Jokinen, T., Junninen,  
342 H., Kangasluoma, J., Keskinen, H., Kim, J., Krapf, M., Kurten, A., Laaksonen, A.,

343 Lawler, M., Leiminger, M., Mathot, S., Mohler, O., Nieminen, T., Onnela, A.,  
344 Petaja, T., Piel, F. M., Miettinen, P., Rissanen, M. P., Rondo, L., Sarnela, N.,  
345 Schobesberger, S., Sengupta, K., Sipila, M., Smith, J. N., Steiner, G., Tome, A.,  
346 Virtanen, A., Wagner, A. C., Weingartner, E., Wimmer, D., Winkler, P. M., Ye, P.,  
347 Carslaw, K. S., Curtius, J., Dommen, J., Kirkby, J., Kulmala, M., Riipinen, I.,  
348 Worsnop, D. R., Donahue, N. M., and Baltensperger, U.: The role of low-volatility  
349 organic compounds in initial particle growth in the atmosphere, *Nature*, 533, 527-  
350 531, 10.1038/nature18271, 2016.

351 Wang, Y., Ren, J., Huang, X. H. H., Tong, R., and Yu, J. Z.: Synthesis of Four  
352 Monoterpene-Derived Organosulfates and Their Quantification in Atmospheric  
353 Aerosol Samples, *Environ. Sci. Technol.*, 51, 6791-6801, 10.1021/acs.est.7b01179,  
354 2017.

355 Wang, Y., Ma, Y., Kuang, B., Lin, P., Liang, Y., Huang, C., and Yu, J. Z.: Abundance of  
356 organosulfates derived from biogenic volatile organic compounds: Seasonal and  
357 spatial contrasts at four sites in China, *Sci. Total. Environ.*, 806, 151275,  
358 10.1016/j.scitotenv.2021.151275, 2022.

359 Wang, Y., Ma, Y., Li, X., Kuang, B. Y., Huang, C., Tong, R., and Yu, J. Z.: Monoterpene  
360 and Sesquiterpene alpha-Hydroxy Organosulfates: Synthesis, MS/MS  
361 Characteristics, and Ambient Presence, *Environ. Sci. Technol.*, 53, 12278-12290,  
362 10.1021/acs.est.9b04703, 2019.

363 Wang, Y., Zhao, Y., Wang, Y., Yu, J. Z., Shao, J., Liu, P., Zhu, W., Cheng, Z., Li, Z., Yan,  
364 N., and Xiao, H.: Organosulfates in atmospheric aerosols in Shanghai, China:

365 seasonal and interannual variability, origin, and formation mechanisms, *Atmos.*  
366 *Chem. Phys.*, 21, 2959-2980, 10.5194/acp-21-2959-2021, 2021a.

367 Wang, Y., Hu, M., Wang, Y.-C., Li, X., Fang, X., Tang, R., Lu, S., Wu, Y., Guo, S., Wu,  
368 Z., Hallquist, M., and Yu, J. Z.: Comparative Study of Particulate Organosulfates  
369 in Contrasting Atmospheric Environments: Field Evidence for the Significant  
370 Influence of Anthropogenic Sulfate and NO<sub>x</sub>, *Environ. Sci. Technol. Lett.*, 7, 787-  
371 794, 10.1021/acs.estlett.0c00550, 2020.

372 Wang, Y., Hu, M., Guo, S., Wang, Y., Zheng, J., Yang, Y., Zhu, W., Tang, R., Li, X., Liu,  
373 Y., Le Breton, M., Du, Z., Shang, D., Wu, Y., Wu, Z., Song, Y., Lou, S., Hallquist,  
374 M., and Yu, J.: The secondary formation of organosulfates under interactions  
375 between biogenic emissions and anthropogenic pollutants in summer in Beijing,  
376 *Atmos. Chem. Phys.*, 18, 10693-10713, 10.5194/acp-18-10693-2018, 2018.

377 Wang, Z., Ehn, M., Rissanen, M. P., Garmash, O., Quéléver, L., Xing, L., Monge-  
378 Palacios, M., Rantala, P., Donahue, N. M., Berndt, T., and Sarathy, S. M.: Efficient  
379 alkane oxidation under combustion engine and atmospheric conditions, *Commun.*  
380 *Chem.*, 4, 10.1038/s42004-020-00445-3, 2021b.

381 Xie, Q., Su, S., Chen, J., Dai, Y., Yue, S., Su, H., Tong, H., Zhao, W., Ren, L., Xu, Y.,  
382 Cao, D., Li, Y., Sun, Y., Wang, Z., Liu, C.-Q., Kawamura, K., Jiang, G., Cheng, Y.,  
383 and Fu, P.: Increase of nitrooxy organosulfates in firework-related urban aerosols  
384 during Chinese New Year's Eve, *Atmos. Chem. Phys.*, 21, 11453-11465,  
385 10.5194/acp-21-11453-2021, 2021.

386 Xie, Q., Li, Y., Yue, S., Su, S., Cao, D., Xu, Y., Chen, J., Tong, H., Su, H., Cheng, Y.,

387 Zhao, W., Hu, W., Wang, Z., Yang, T., Pan, X., Sun, Y., Wang, Z., Liu, C. Q.,  
388 Kawamura, K., Jiang, G., Shiraiwa, M., and Fu, P.: Increase of High Molecular  
389 Weight Organosulfate With Intensifying Urban Air Pollution in the Megacity  
390 Beijing, *J. Geophys. Res.: Atmos.* , 125, 10.1029/2019jd032200, 2020.

391 Xu, Z. N., Nie, W., Liu, Y. L., Sun, P., Huang, D. D., Yan, C., Krechmer, J., Ye, P. L.,  
392 Xu, Z., Qi, X. M., Zhu, C. J., Li, Y. Y., Wang, T. Y., Wang, L., Huang, X., Tang, R.  
393 Z., Guo, S., Xiu, G. L., Fu, Q. Y., Worsnop, D., Chi, X. G., and Ding, A. J.:  
394 Multifunctional Products of Isoprene Oxidation in Polluted Atmosphere and Their  
395 Contribution to SOA, *Geophys. Res. Lett.*, 48, 10.1029/2020gl089276, 2021.

396 Yan, C., Nie, W., Äijälä, M., Rissanen, M. P., Canagaratna, M. R., Massoli, P., Junninen,  
397 H., Jokinen, T., Sarnela, N., Häme, S. A. K., Schobesberger, S., Canonaco, F., Yao,  
398 L., Prévôt, A. S. H., Petäjä, T., Kulmala, M., Sipilä, M., Worsnop, D. R., and Ehn,  
399 M.: Source characterization of highly oxidized multifunctional compounds in a  
400 boreal forest environment using positive matrix factorization, *Atmos. Chem. Phys.*,  
401 16, 12715-12731, 10.5194/acp-16-12715-2016, 2016.

402 Yassine, M. M., Dabek-Zlotorzynska, E., Harir, M., and Schmitt-Kopplin, P.:  
403 Identification of weak and strong organic acids in atmospheric aerosols by  
404 capillary electrophoresis/mass spectrometry and ultra-high-resolution Fourier  
405 transform ion cyclotron resonance mass spectrometry, *Anal. Chem.*, 84, 6586-  
406 6594, 10.1021/ac300798g, 2012.

407 Yassine, M. M., Harir, M., Dabek-Zlotorzynska, E., and Schmitt-Kopplin, P.: Structural  
408 characterization of organic aerosol using Fourier transform ion cyclotron



409 resonance mass spectrometry: aromaticity equivalent approach, *Rapid. Commun.*  
410 *Mass. Spectrom.*, 28, 2445-2454, 10.1002/rcm.7038, 2014.

411 Ye, Y., Zhan, H., Yu, X., Li, J., Wang, X., and Xie, Z.: Detection of organosulfates and  
412 nitrooxy-organosulfates in Arctic and Antarctic atmospheric aerosols, using ultra-  
413 high resolution FT-ICR mass spectrometry, *Sci. Total. Environ.*, 767, 144339,  
414 10.1016/j.scitotenv.2020.144339, 2021.

415
